# Supplementary material for: Photoredox catalytic intramolecular imine C–H bond functionalization using ligand free Cu(ii) salts
Source: Royal Society of Chemistry journal article supplement (doi:10.1039/c7qo00348j), 2017-01-01

## Qualitative Analysis Report

|                        |            |               |                             |
|------------------------|------------|---------------|-----------------------------|
| Data Filename          | 2130.d     | Sample Name   | HYL5001                     |
| Instrument Name        | TOF G6230A | Acquired Time | 2016-09-14                  |
| Acq Method             | YCL.M      | Acquired SW   | 6200 series TOF/6500 series |
| IRM Calibration Status | Success    |               |                             |
| User Chormatograms     |            |               |                             |

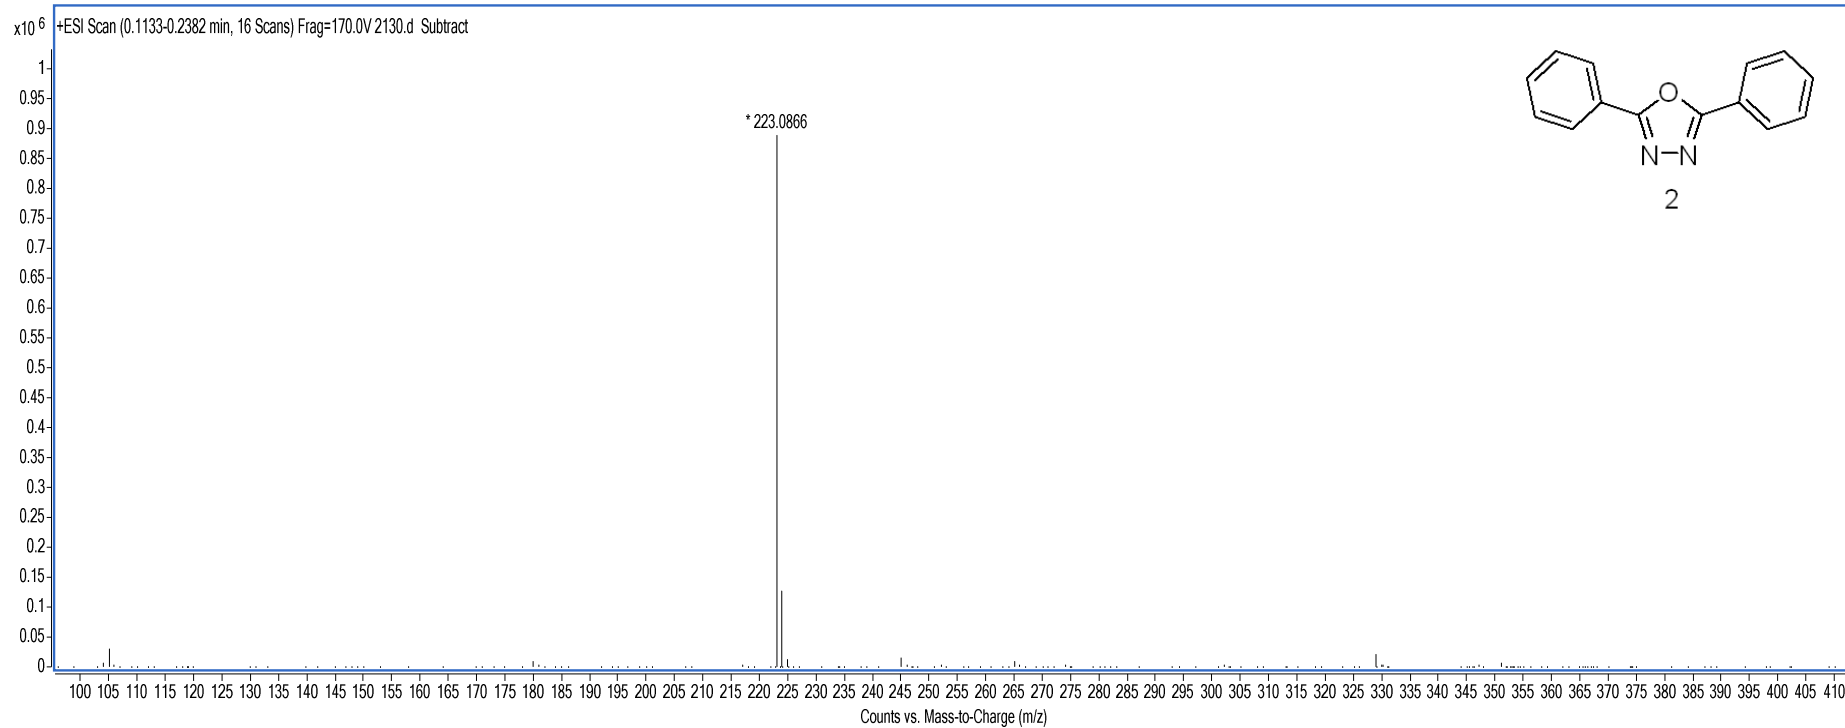

## Qualitative Analysis Report

**Data Filename** 2170.d  
**Instrument Name** TOF G6230A  
**Acq Method** YCL.M  
**IRM Calibration Status** Success  
**User Chormatograms**

**Sample Name** HYL5022A  
**Acquired Time** 2016-09-19  
**Acquired SW** 6200 series TOF/6500 series

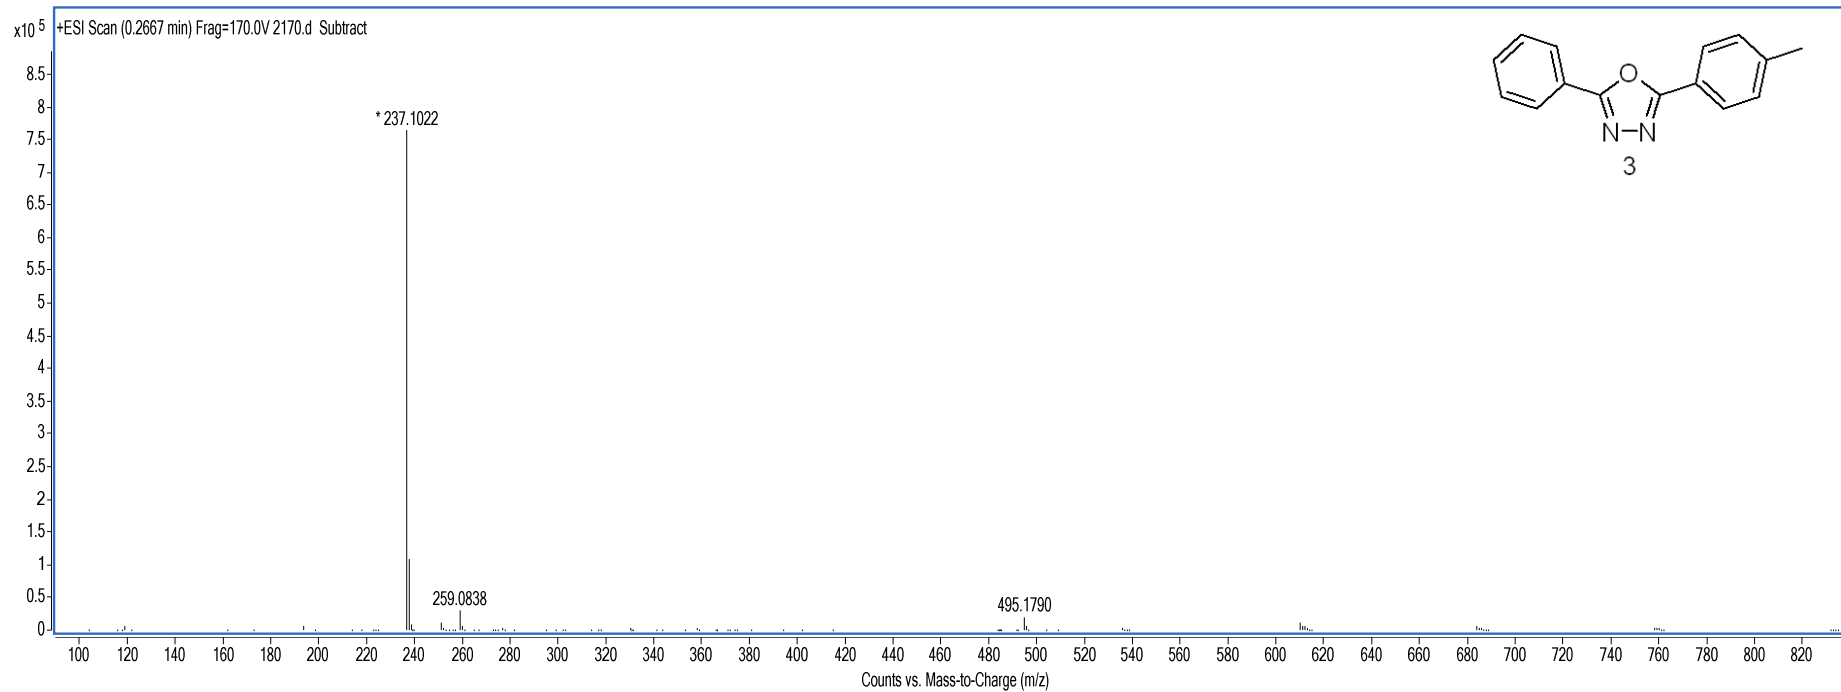

## Qualitative Analysis Report

**Data Filename** 2136.d  
**Instrument Name** TOF G6230A  
**Acq Method** YCL.M  
**IRM Calibration Status** Success  
**User Chromatograms**

**Sample Name** HYL5035  
**Acquired Time** 2016-09-14  
**Acquired SW** 6200 series TOF/6500 series

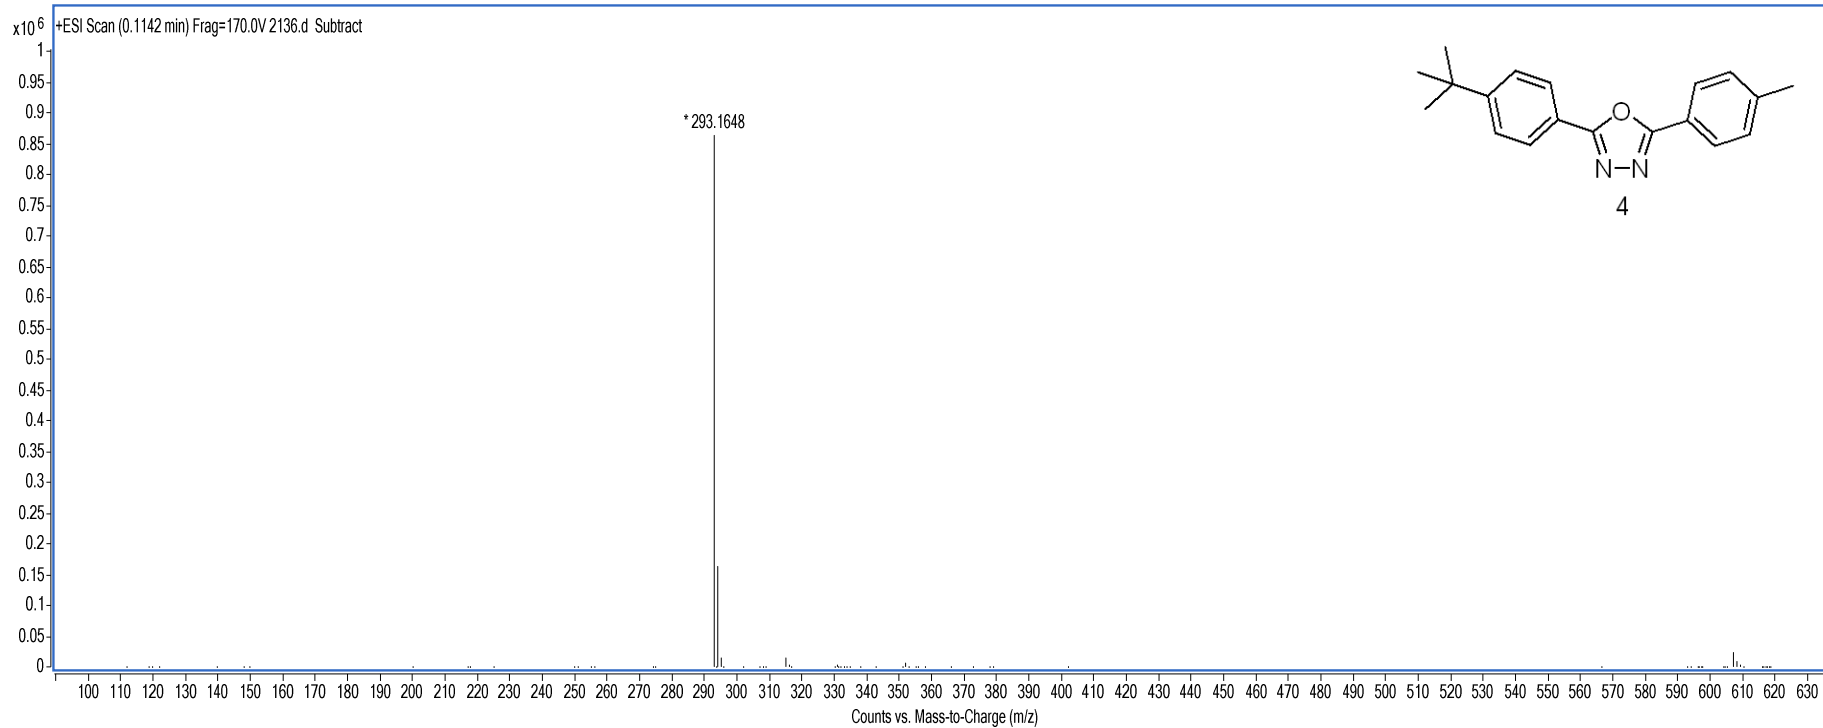

## Qualitative Analysis Report

**Data Filename** 2171.d  
**Instrument Name** TOF G6230A  
**Acq Method** YCL.M  
**IRM Calibration Status** Success  
**User Chromatograms**

**Sample Name** HYL5022C  
**Acquired Time** 2016-09-19  
**Acquired SW** 6200 series TOF/6500 series

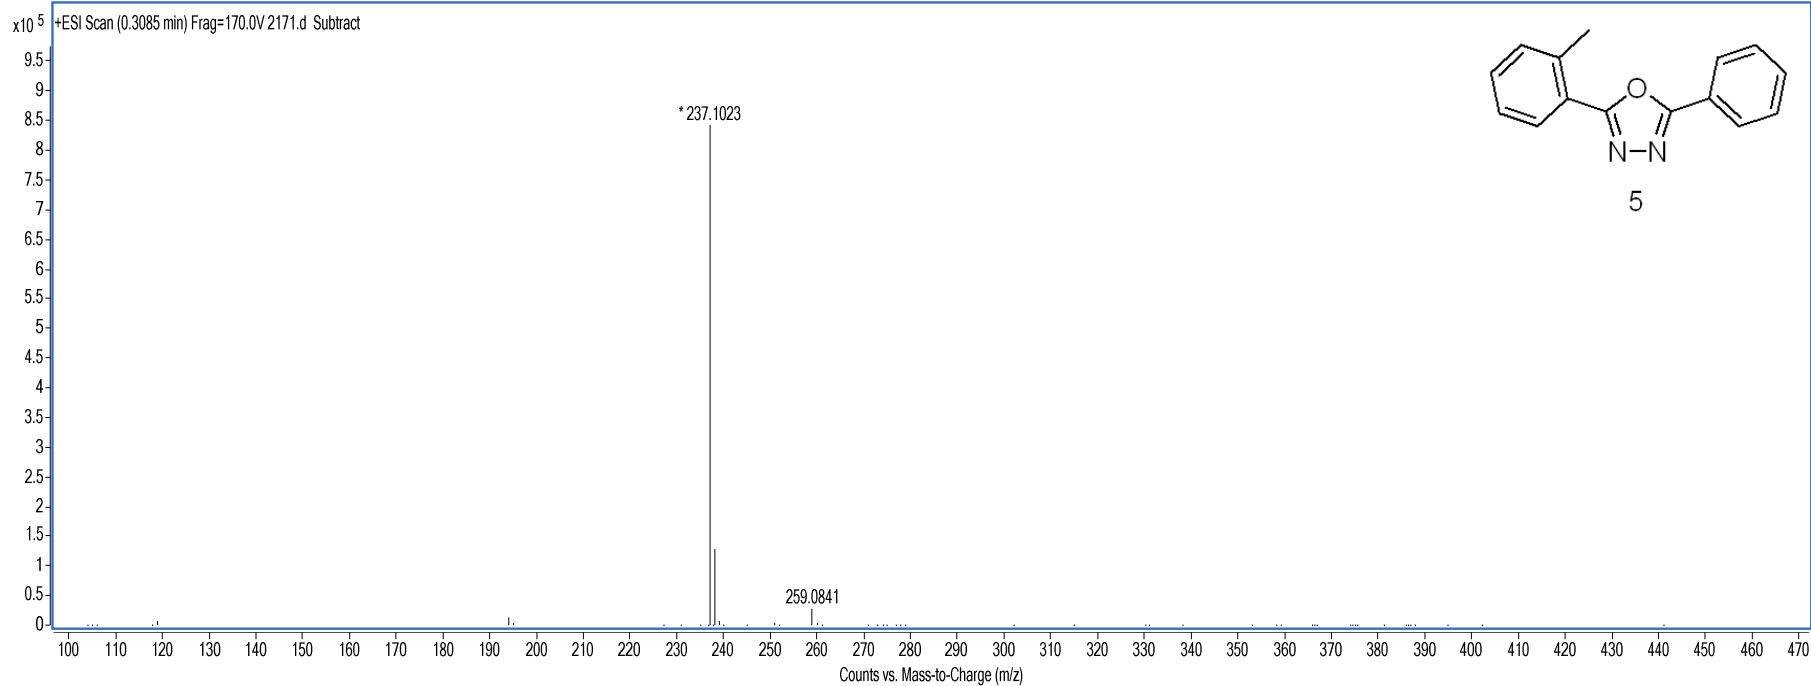

## Qualitative Analysis Report

**Data Filename** 2134.d  
**Instrument Name** TOF G6230A  
**Acq Method** YCL.M  
**IRM Calibration Status** Success  
**User Chormatograms**

**Sample Name** HYL5026  
**Acquired Time** 2016-09-14  
**Acquired SW** 6200 series TOF/6500 series

x10<sup>5</sup> +ESI Scan (0.0953-0.3619 min, 33 Scans) Frag=170.0V 2134.d Subtract

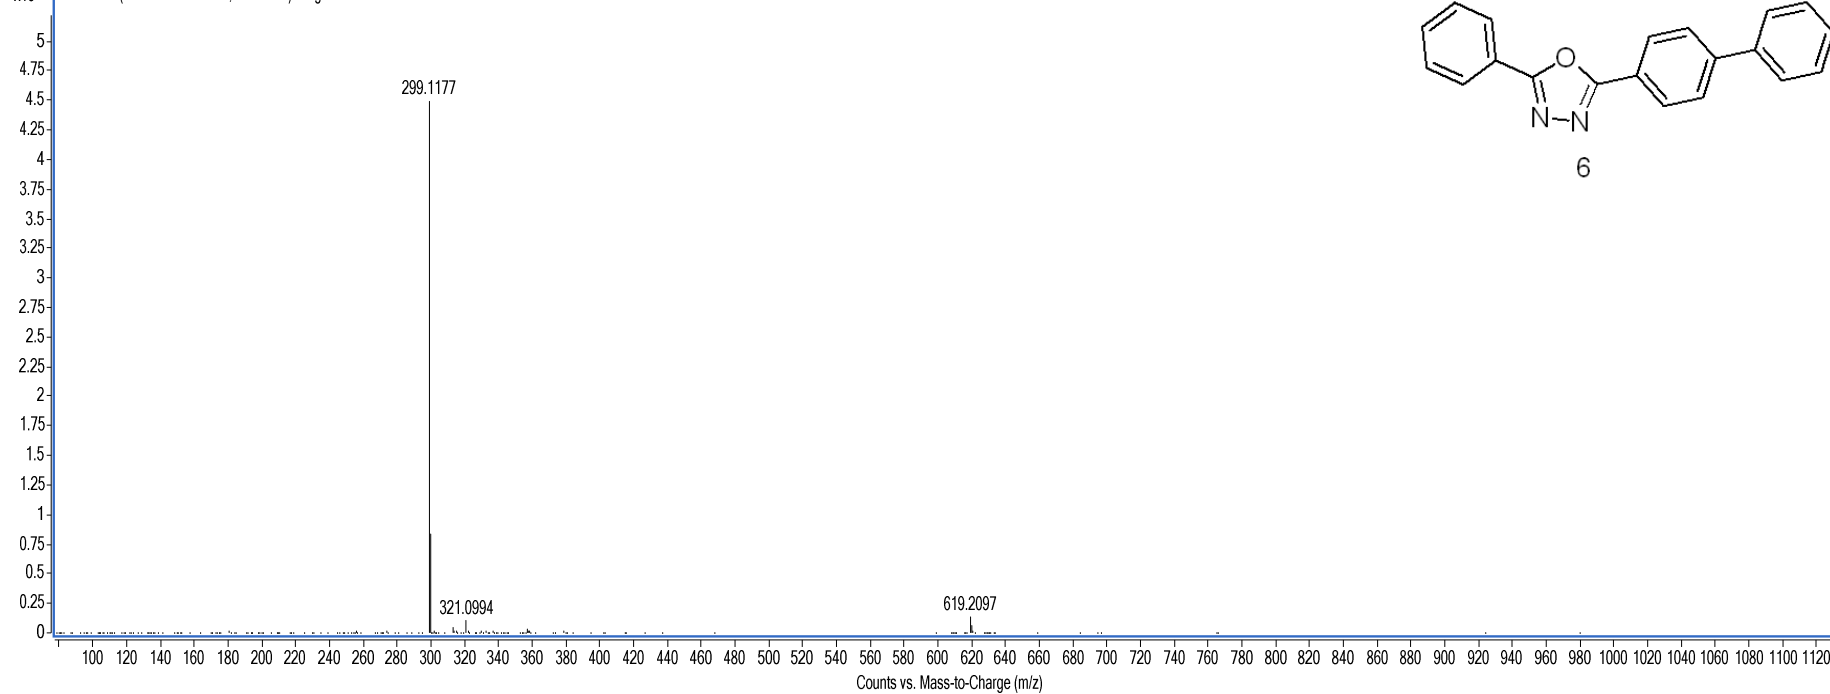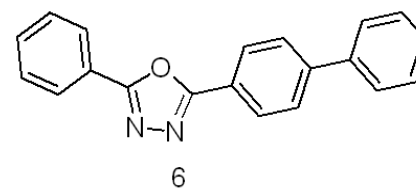

## Qualitative Analysis Report

**Data Filename** 2135.d  
**Instrument Name** TOF G6230A  
**Acq Method** YCL.M  
**IRM Calibration Status** Success  
**User Chromatograms**

**Sample Name** HYL5032  
**Acquired Time** 2016-09-14  
**Acquired SW** 6200 series TOF/6500 series

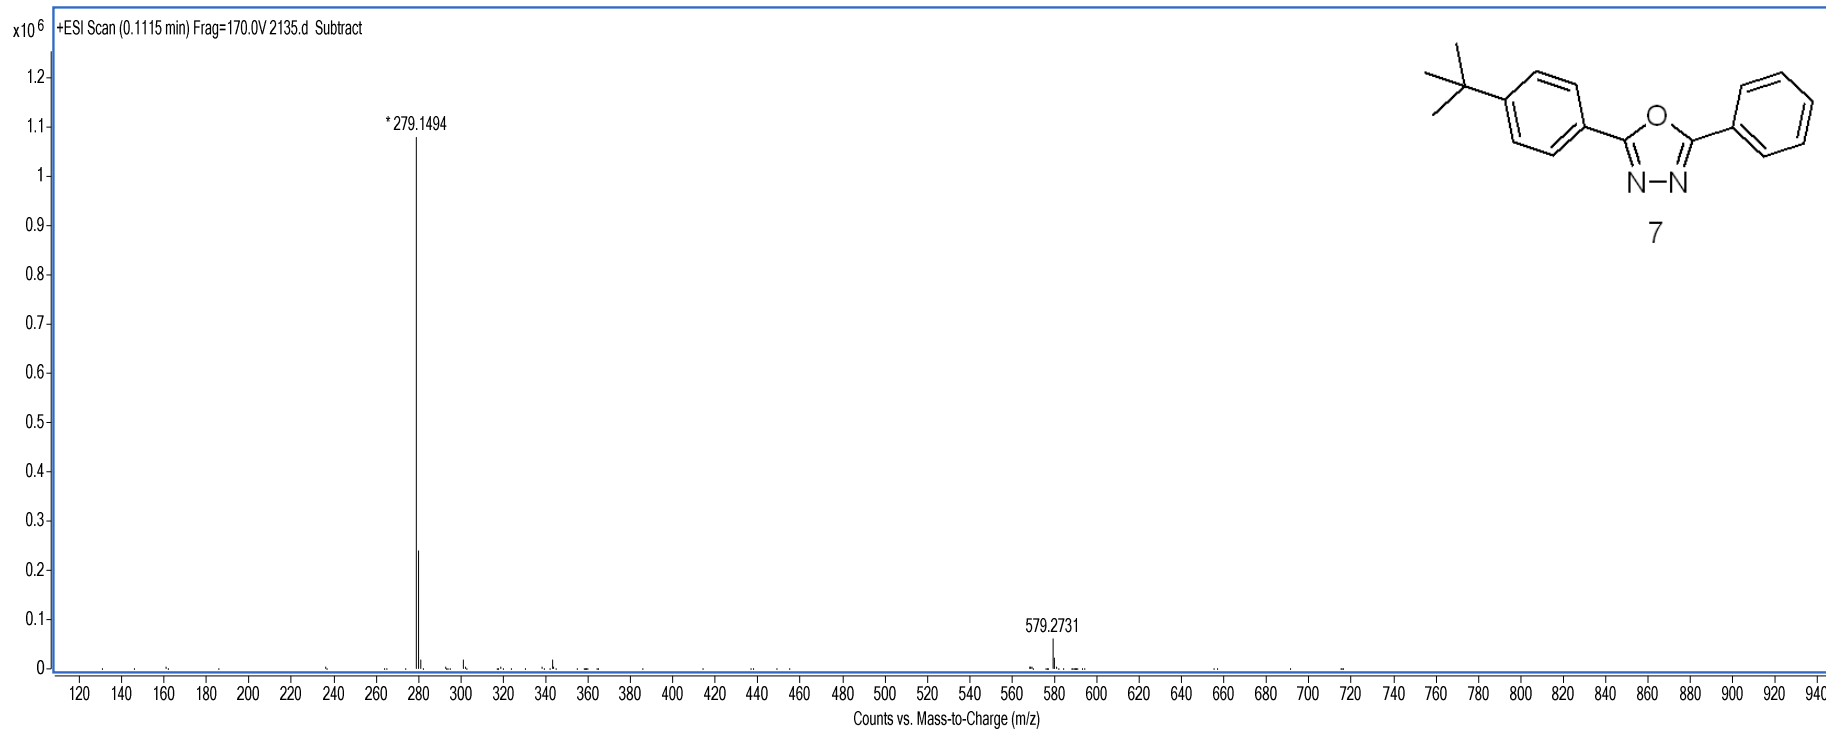

## Qualitative Analysis Report

**Data Filename** 2172.d  
**Instrument Name** TOF G6230A  
**Acq Method** YCL.M  
**IRM Calibration Status** Success  
**User Chromatograms**

**Sample Name** HYL5024A  
**Acquired Time** 2016-09-19  
**Acquired SW** 6200 series TOF/6500 series

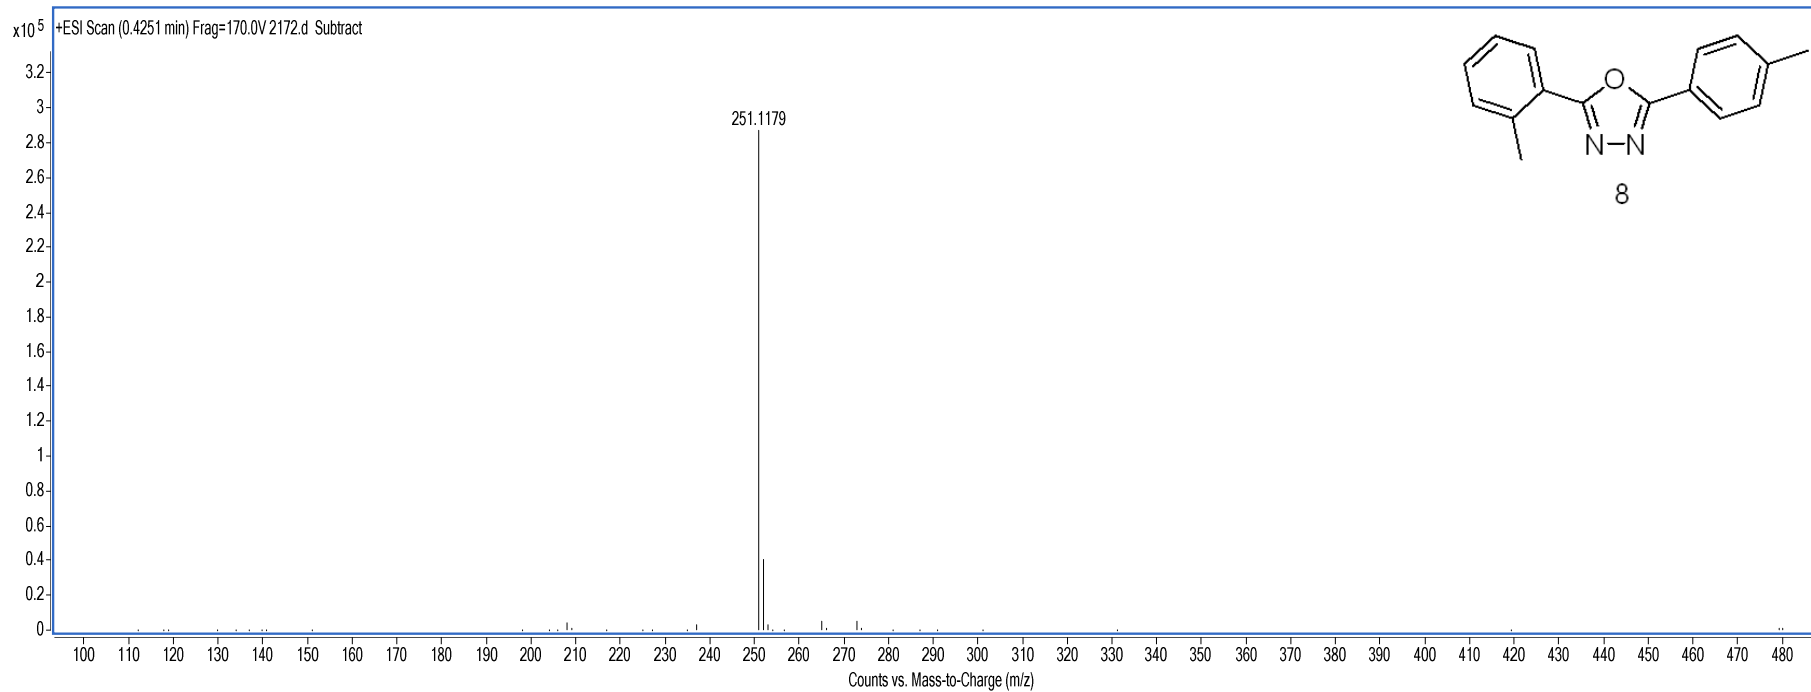

## Qualitative Analysis Report

**Data Filename** 2139.d  
**Instrument Name** TOF G6230A  
**Acq Method** YCL.M  
**IRM Calibration Status** Success  
**User Chromatograms**

**Sample Name** HYL5037  
**Acquired Time** 2016-09-14  
**Acquired SW** 6200 series TOF/6500 series

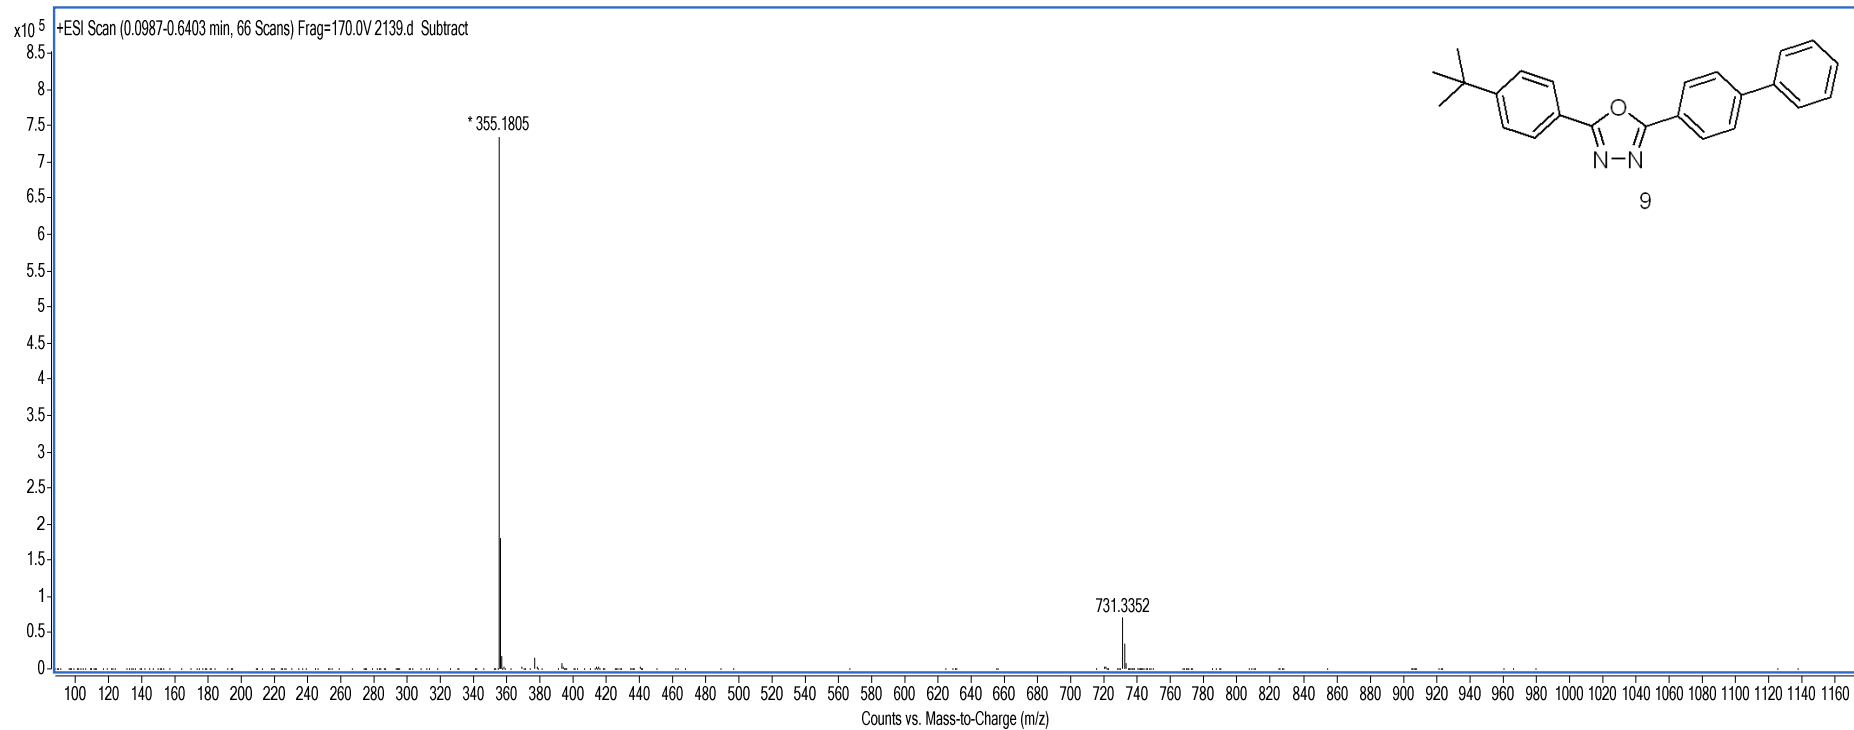



## Qualitative Analysis Report

**Data Filename** 2174.d  
**Instrument Name** TOF G6230A  
**Acq Method** YCL.M  
**IRM Calibration Status** Success  
**User Chormatograms**

**Sample Name** HYL5030  
**Acquired Time** 2016-09-19  
**Acquired SW** 6200 series TOF/6500 series

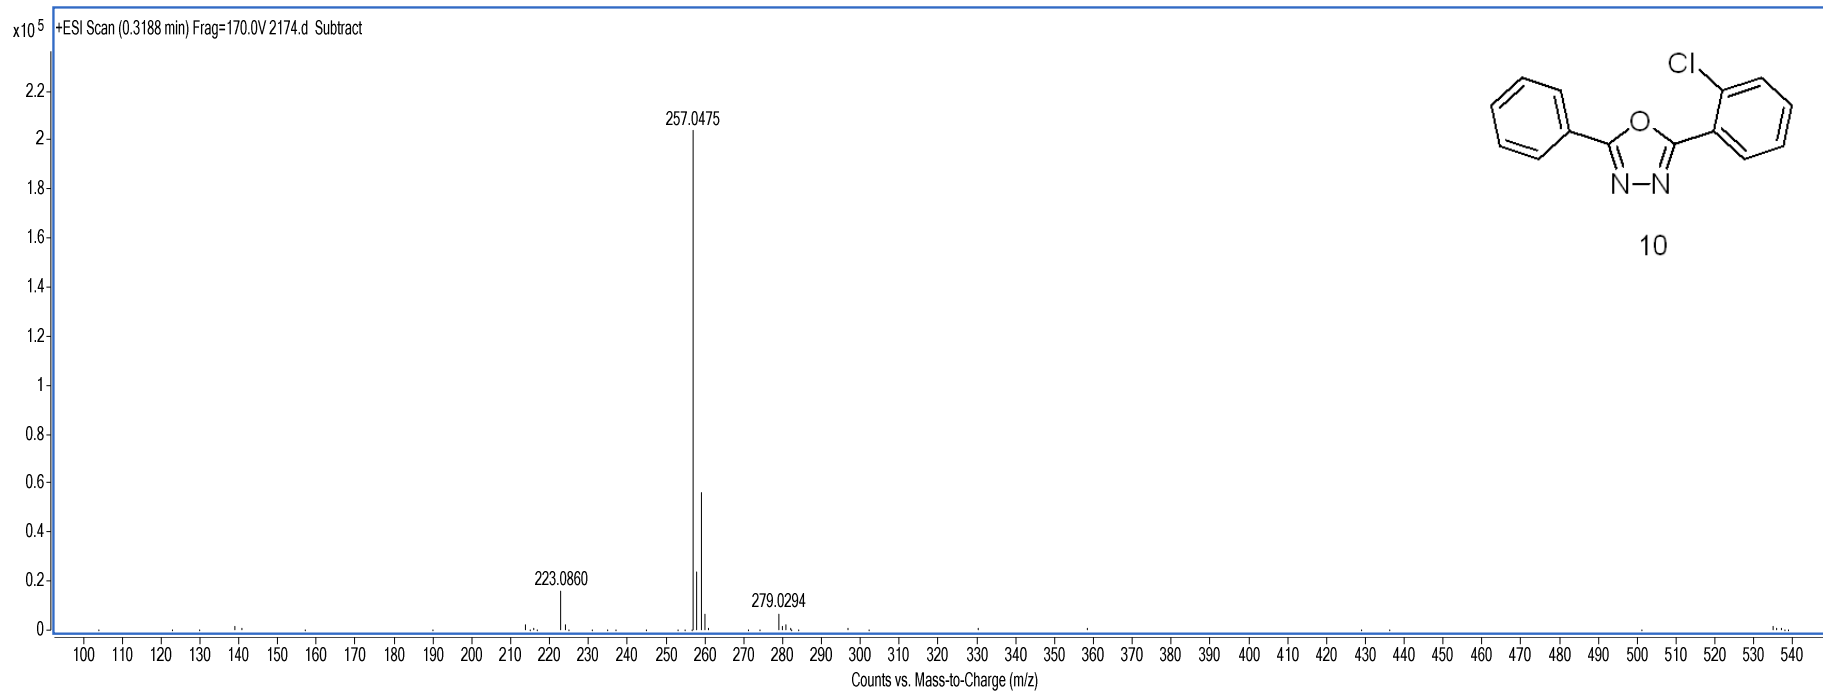

# Qualitative Analysis Report

|                        |            |               |                             |
|------------------------|------------|---------------|-----------------------------|
| Data Filename          | 0709.d     | Sample Name   | WQY6019                     |
| Instrument Name        | TOF G6230A | Acquired Time | 2017-02-17                  |
| Acq Method             | YCL.M      | Acquired SW   | 6200 series TOF/6500 series |
| IRM Calibration Status | Success    |               |                             |
| User Chormatograms     |            |               |                             |

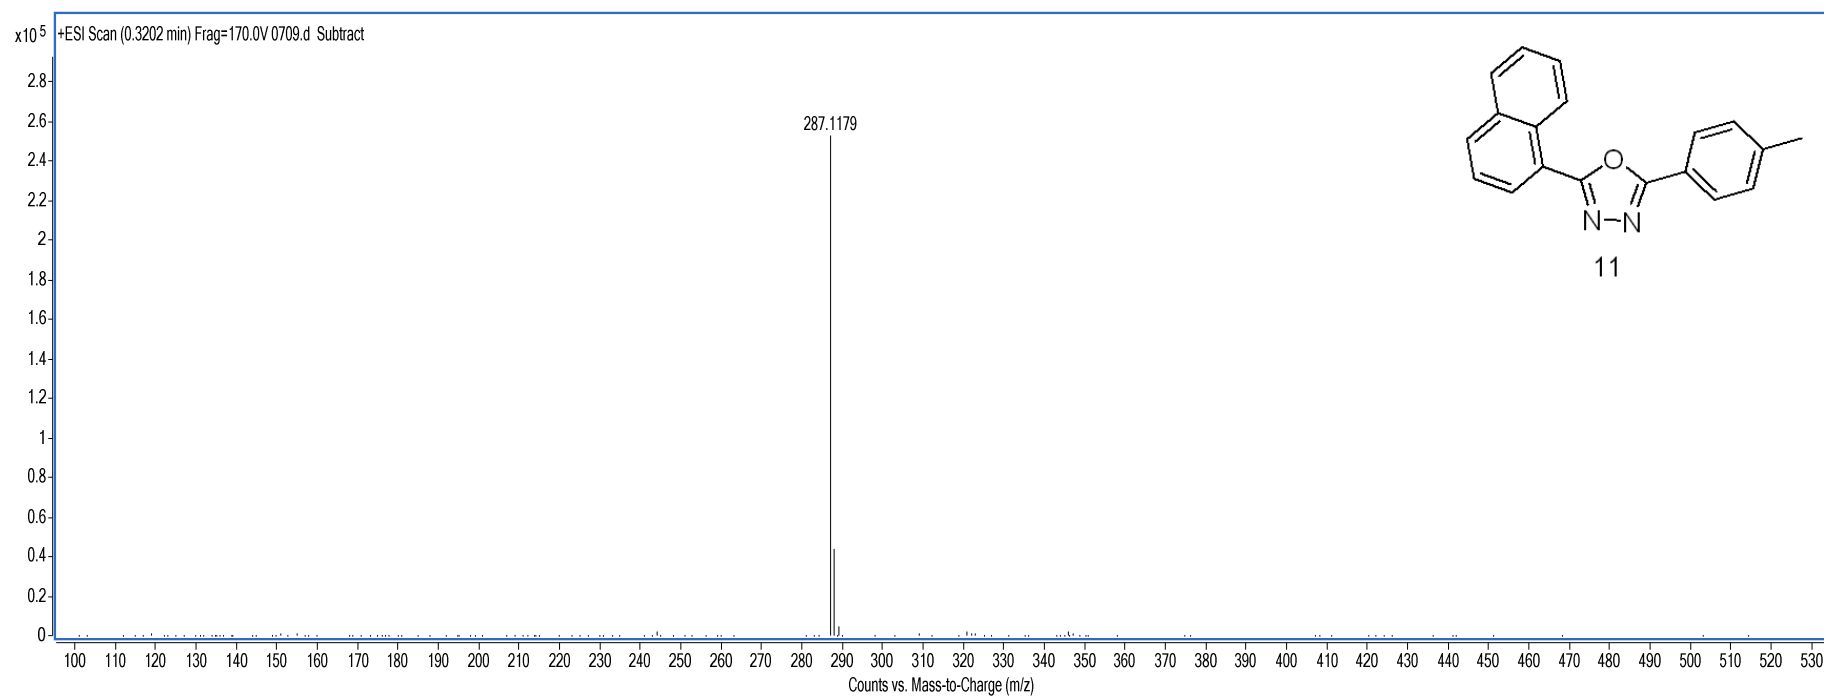

## Qualitative Analysis Report

**Data Filename** 2173.d  
**Instrument Name** TOF G6230A  
**Acq Method** YCL.M  
**IRM Calibration Status** Success  
**User Chormatograms**

**Sample Name** HYL5027  
**Acquired Time** 2016-09-19  
**Acquired SW** 6200 series TOF/6500 series

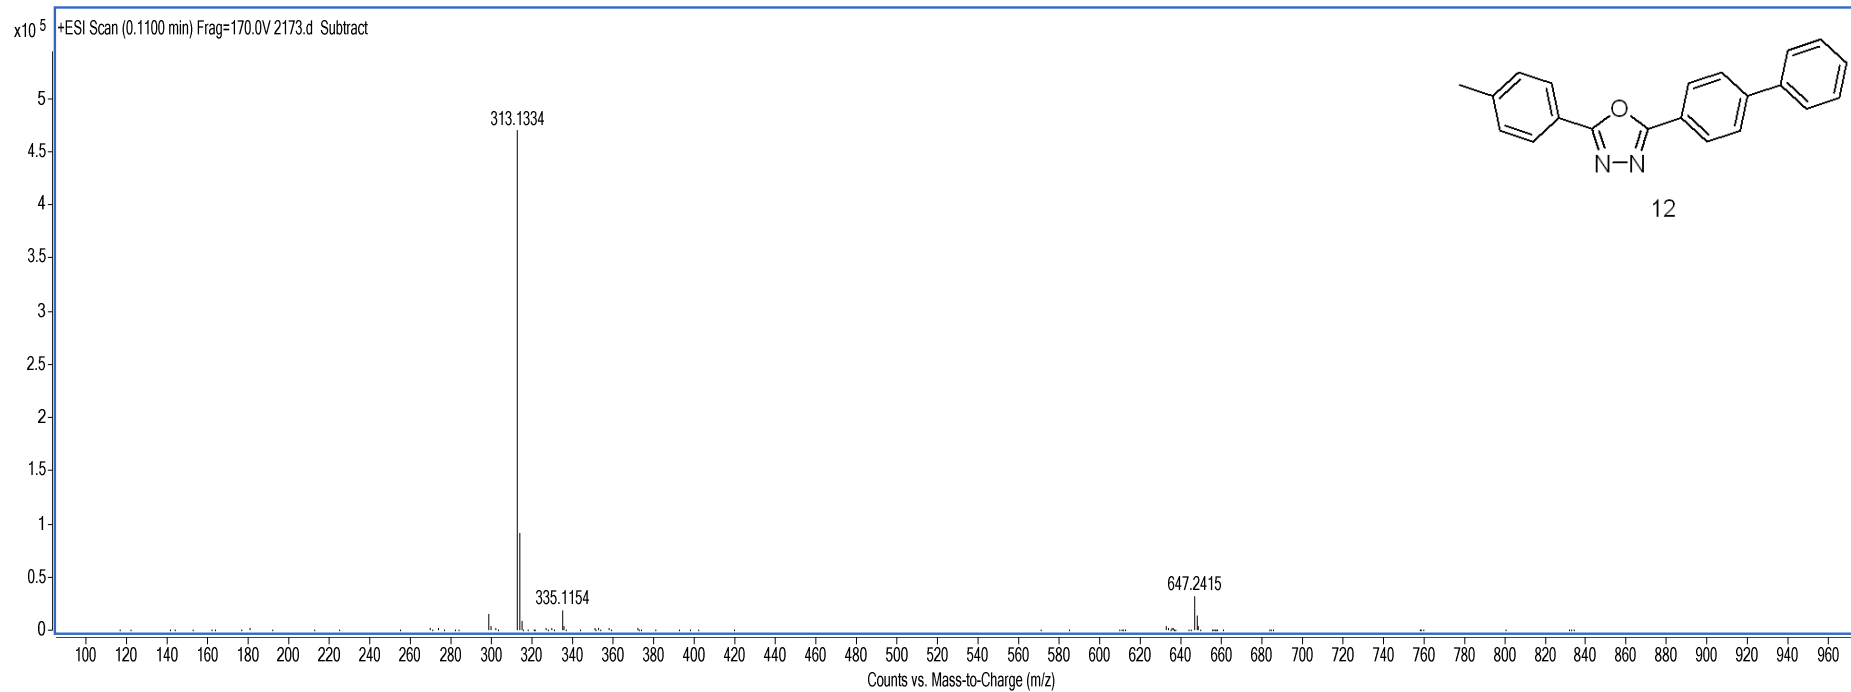

## Qualitative Analysis Report

**Data Filename** 0710.d  
**Instrument Name** TOF G6230A  
**Acq Method** YCL.M  
**IRM Calibration Status** Success  
**User Chromatograms**

**Sample Name** WQY6020  
**Acquired Time** 2017-02-17  
**Acquired SW** 6200 series TOF/6500 series

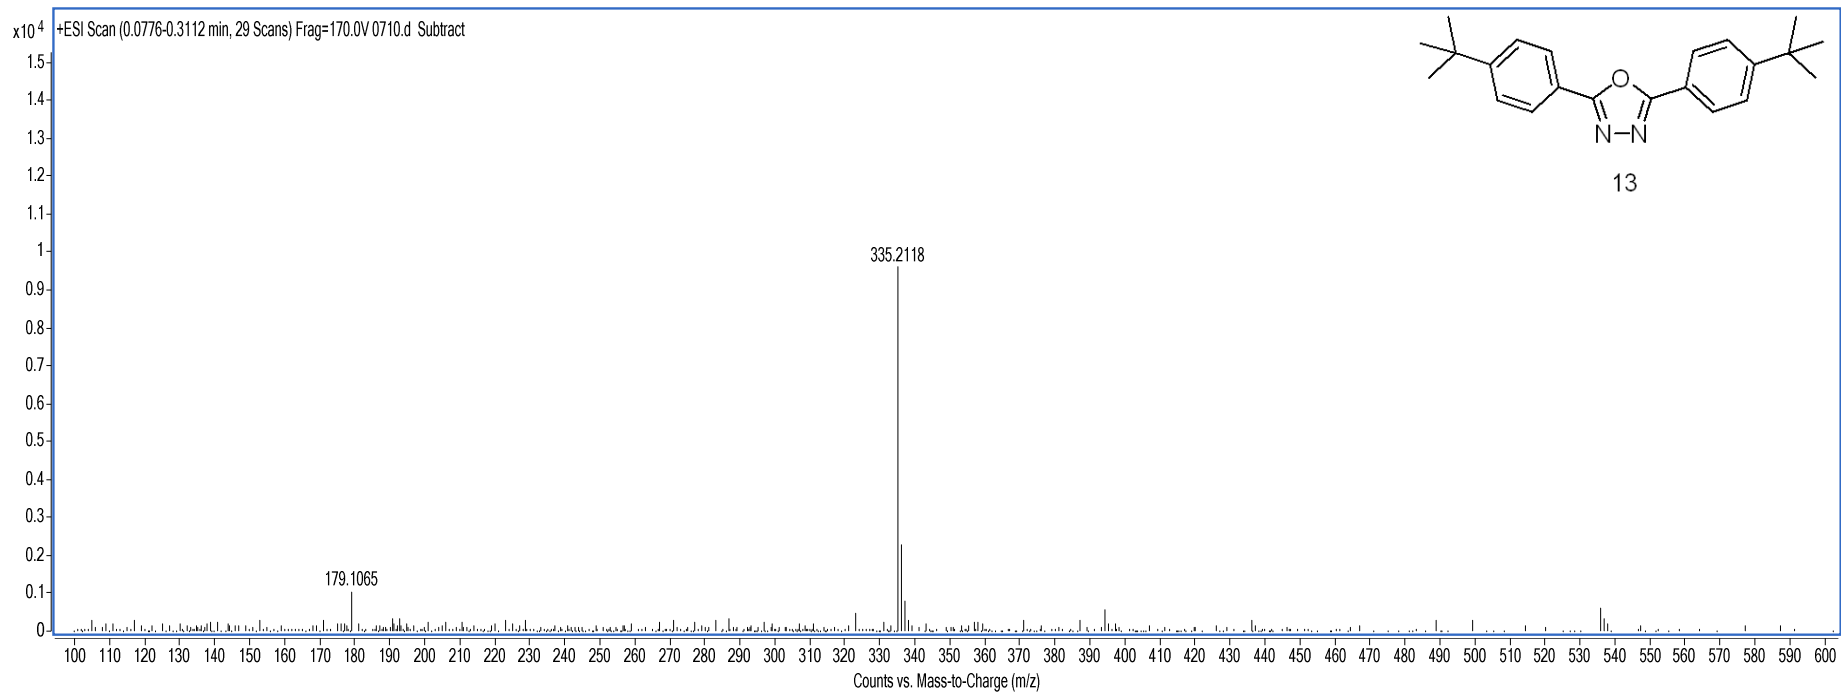

## Qualitative Analysis Report

**Data Filename** 2145.d  
**Instrument Name** TOF G6230A  
**Acq Method** YCL.M  
**IRM Calibration Status** Success  
**User Chromatograms**

**Sample Name** HYL6019  
**Acquired Time** 2016-09-14  
**Acquired SW** 6200 series TOF/6500 series

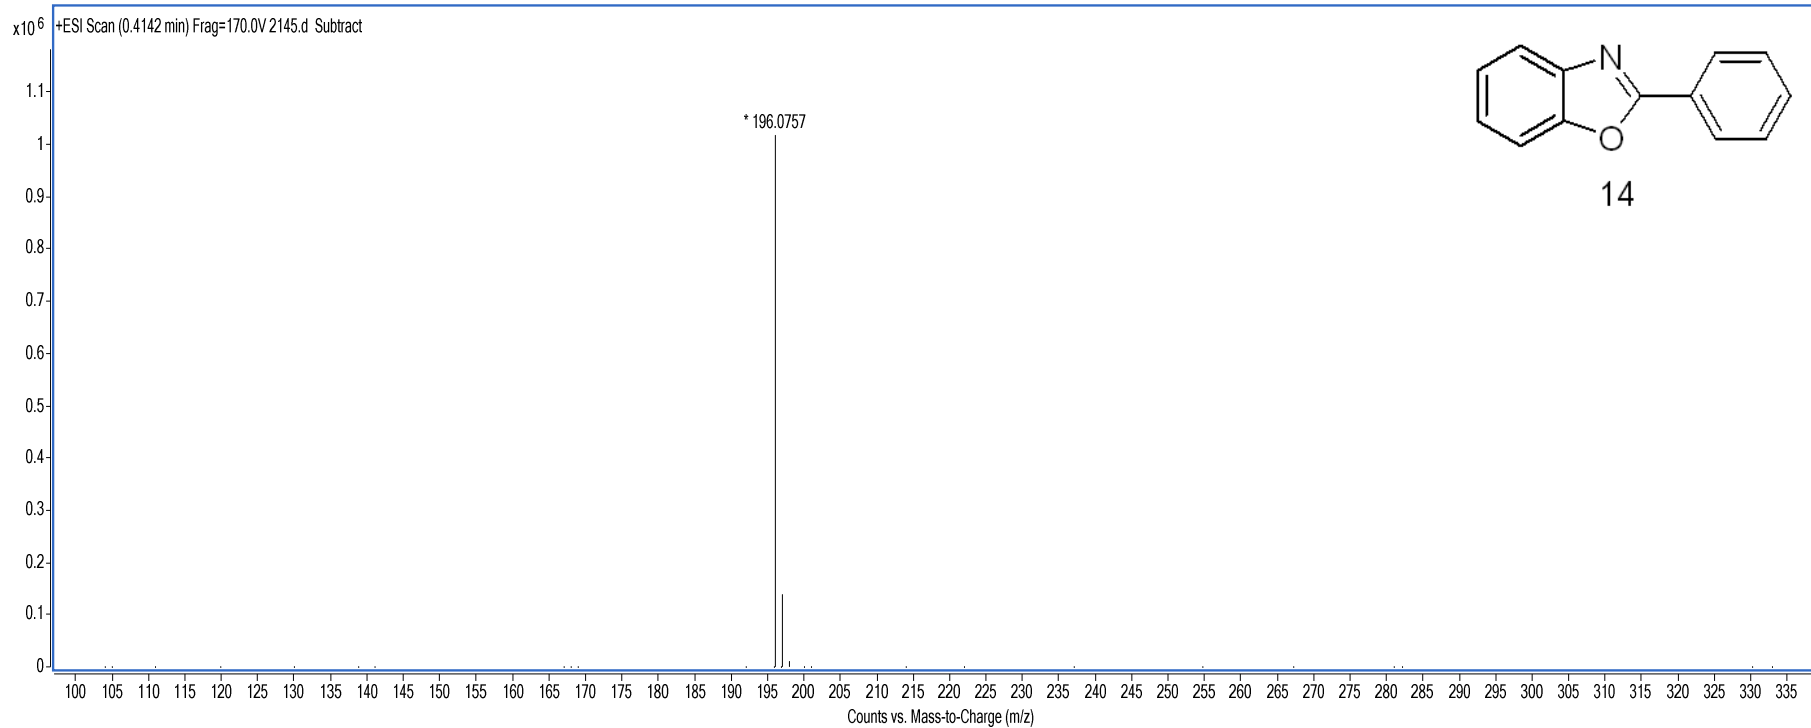

## Qualitative Analysis Report

**Data Filename** 2176.d  
**Instrument Name** TOF G6230A  
**Acq Method** YCL.M  
**IRM Calibration Status** Success  
**User Chormatograms**

**Sample Name** HYL6033  
**Acquired Time** 2016-09-19  
**Acquired SW** 6200 series TOF/6500 series

x10<sup>5</sup> +ESI Scan (0.2772 min) Frag=170.0V 2176.d Subtract

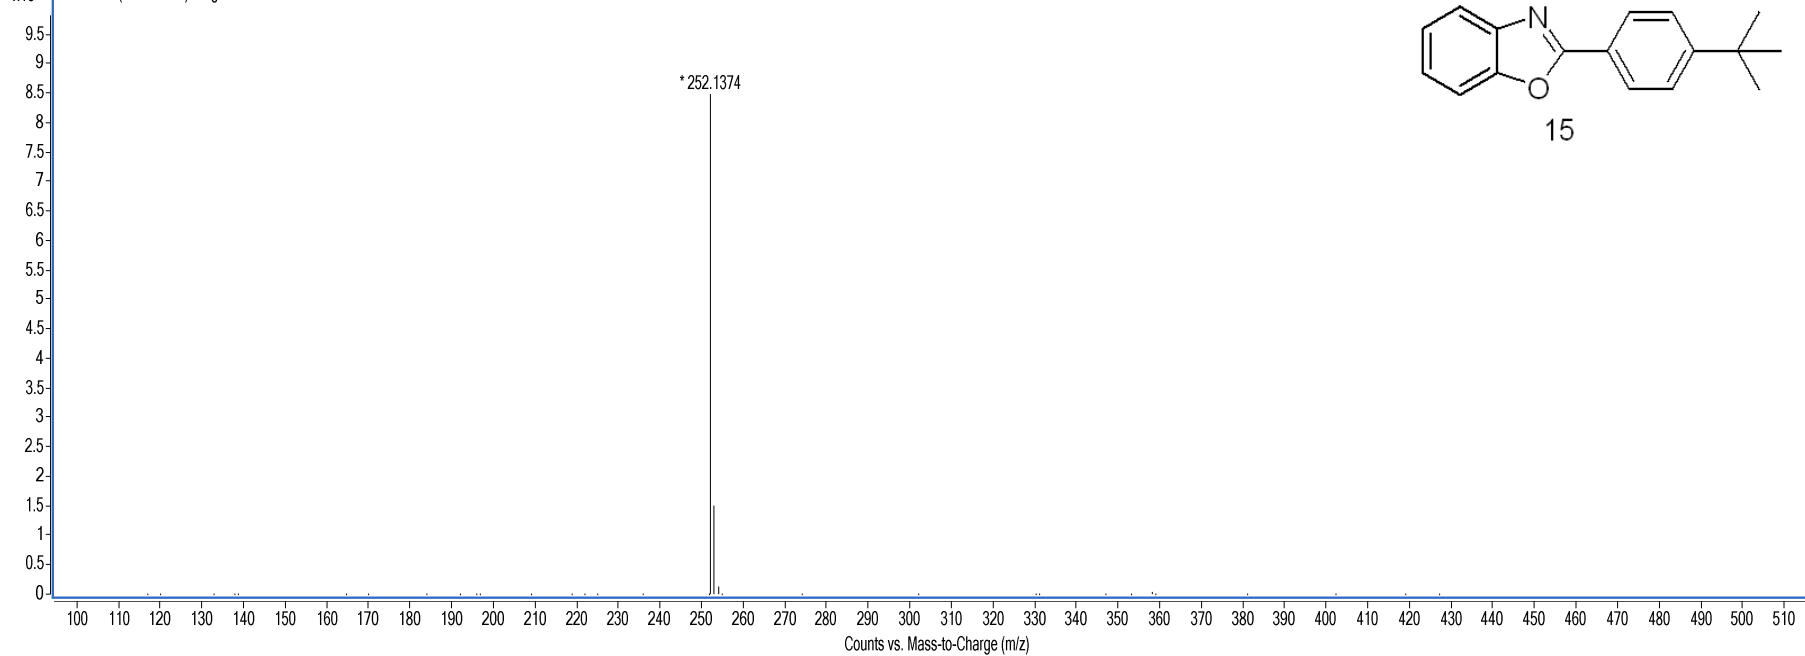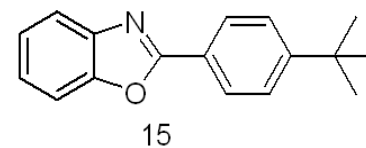

## Qualitative Analysis Report

**Data Filename** 2177.d  
**Instrument Name** TOF G6230A  
**Acq Method** YCL.M  
**IRM Calibration Status** Success  
**User Chromatograms**

**Sample Name** HYL6045  
**Acquired Time** 2016-09-19  
**Acquired SW** 6200 series TOF/6500 series

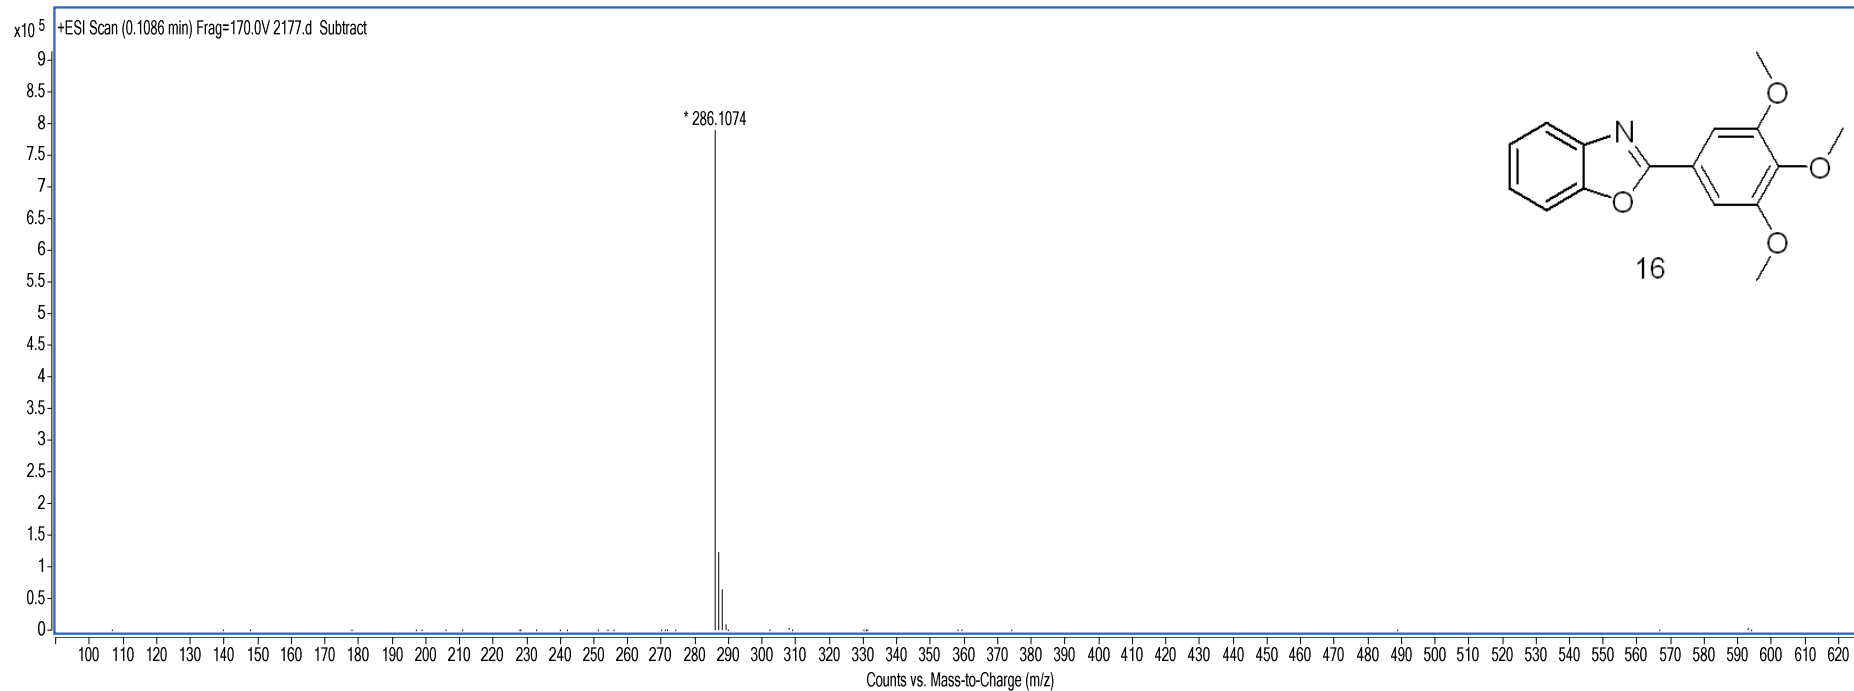

## Qualitative Analysis Report

|                        |            |               |                             |
|------------------------|------------|---------------|-----------------------------|
| Data Filename          | 2178.d     | Sample Name   | HYL6048                     |
| Instrument Name        | TOF G6230A | Acquired Time | 2016-09-19                  |
| Acq Method             | YCL.M      | Acquired SW   | 6200 series TOF/6500 series |
| IRM Calibration Status | Success    |               |                             |
| User Chromatograms     |            |               |                             |

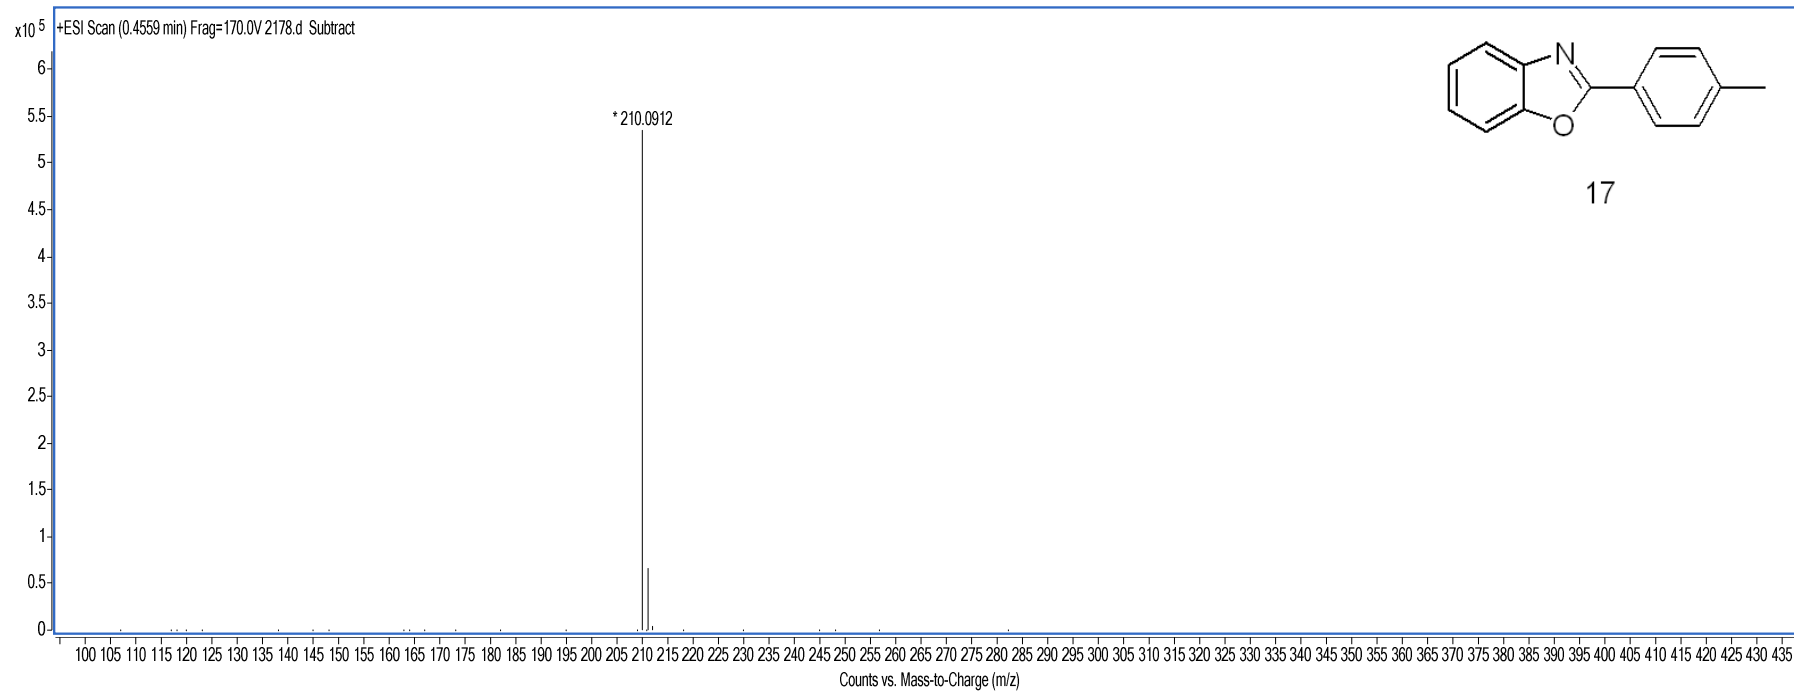



## Qualitative Analysis Report

**Data Filename** 0659.d  
**Instrument Name** TOF G6230A  
**Acq Method** YCL.M  
**IRM Calibration Status** Success  
**User Chormatograms**

**Sample Name** HYL8010  
**Acquired Time** 2017-02-10  
**Acquired SW** 6200 series TOF/6500 series

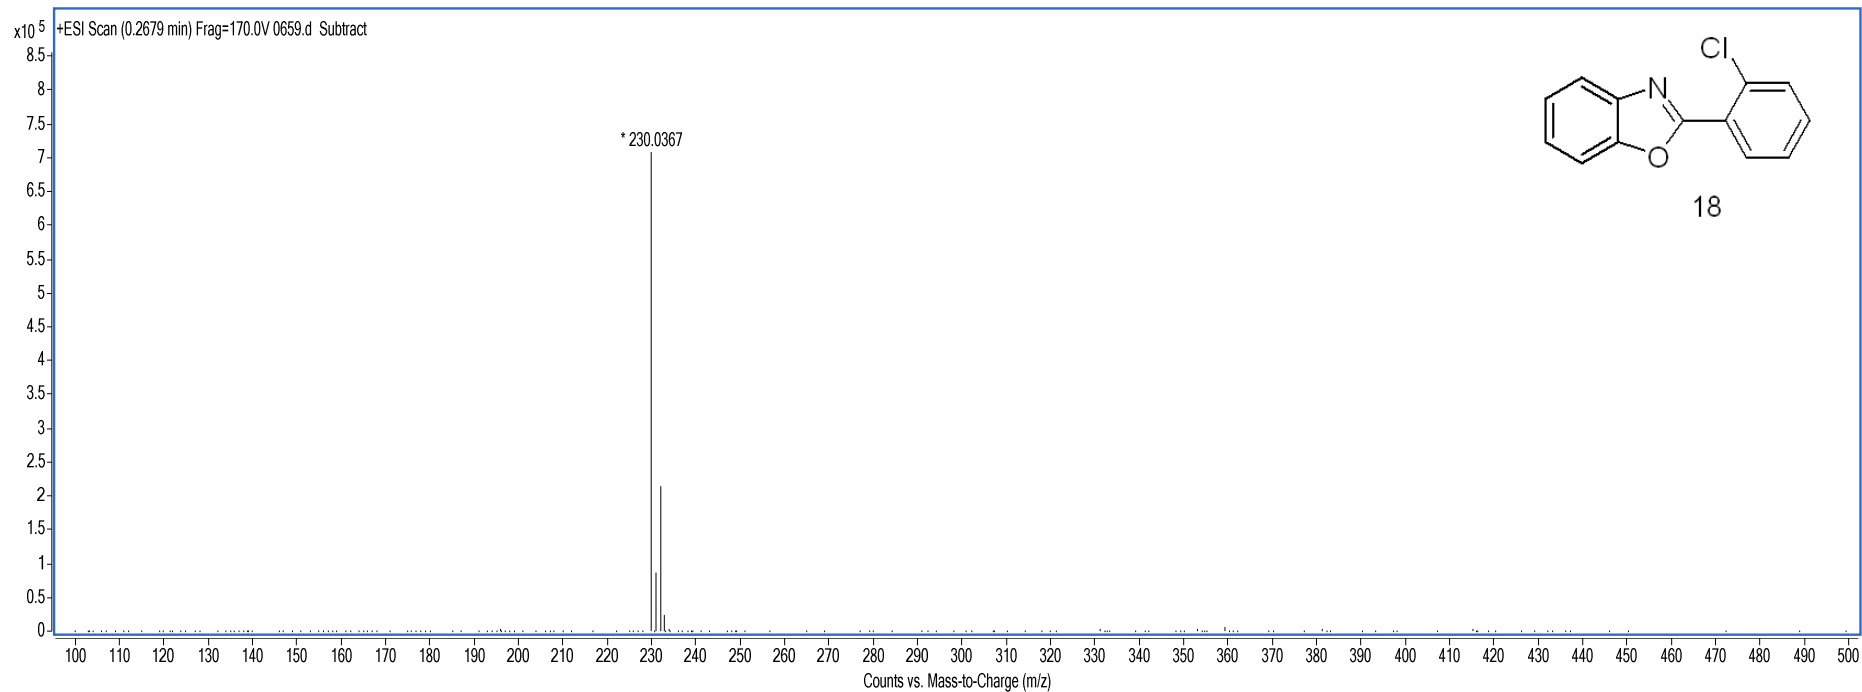

## Qualitative Analysis Report

|                        |            |               |                             |
|------------------------|------------|---------------|-----------------------------|
| Data Filename          | 0660.d     | Sample Name   | HYL8018                     |
| Instrument Name        | TOF G6230A | Acquired Time | 2017-02-10                  |
| Acq Method             | YCL.M      | Acquired SW   | 6200 series TOF/6500 series |
| IRM Calibration Status | Success    |               |                             |
| User Chormatograms     |            |               |                             |

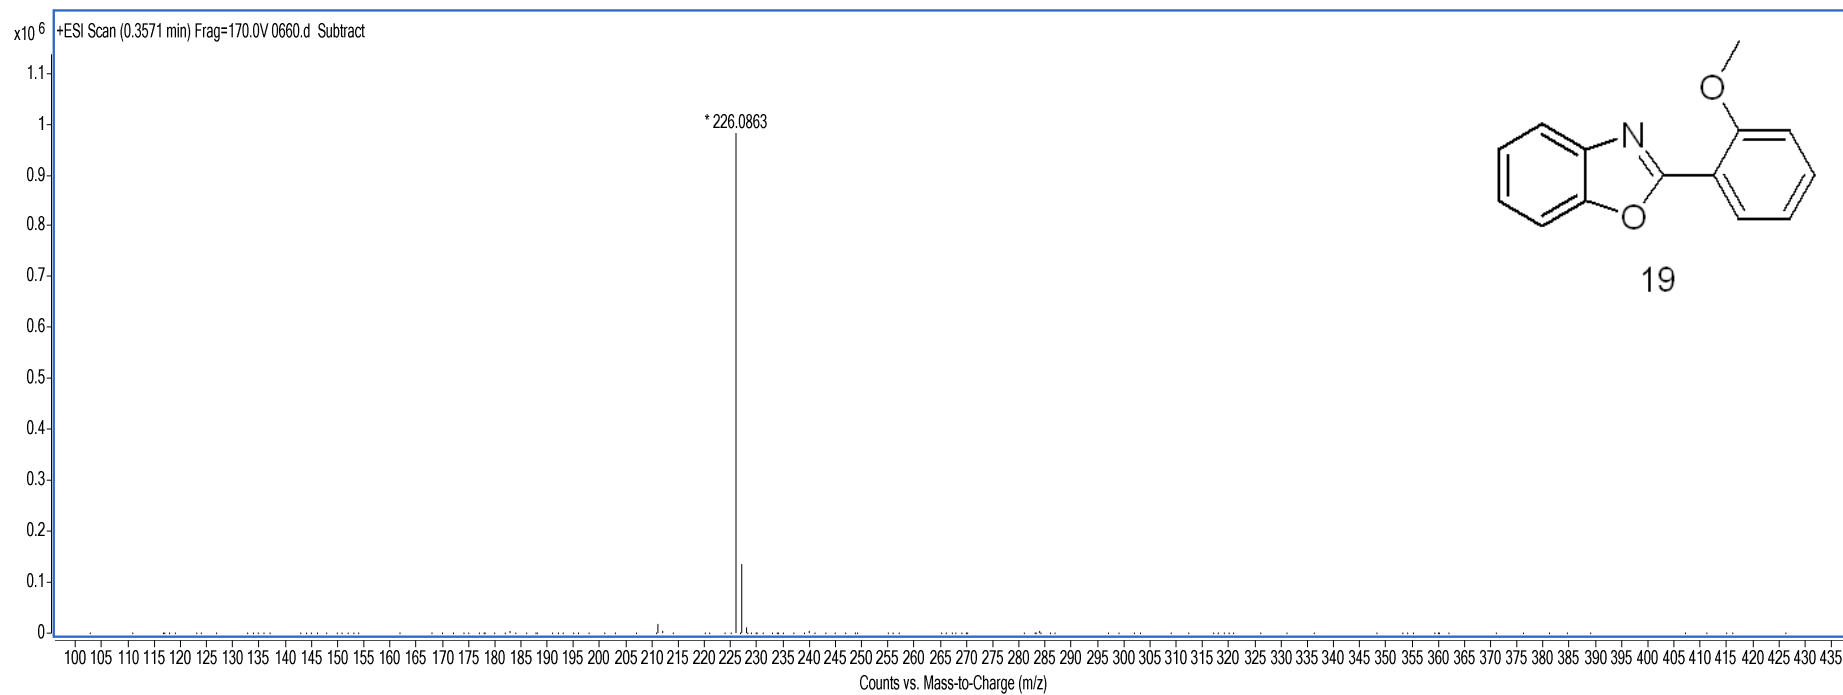

## Qualitative Analysis Report

**Data Filename** 1171.d  
**Instrument Name** TOF G6230A  
**Acq Method** YCL.M  
**IRM Calibration Status** Success  
**User Chromatograms**

**Sample Name** WJ3048  
**Acquired Time** 2017-03-16  
**Acquired SW** 6200 series TOF/6500 series

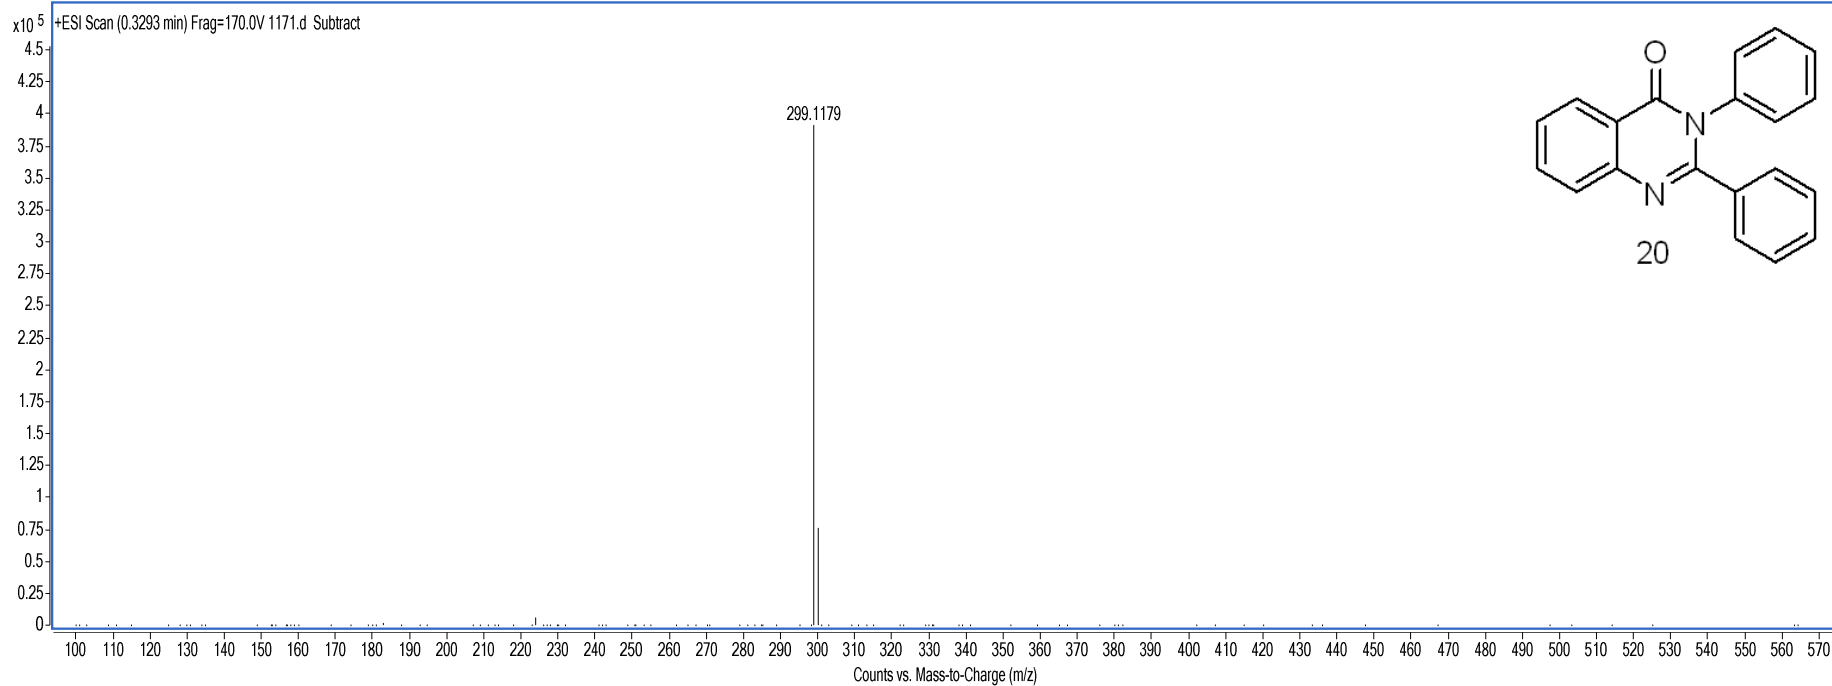

## Qualitative Analysis Report

**Data Filename** 2140.d  
**Instrument Name** TOF G6230A  
**Acq Method** YCL.M  
**IRM Calibration Status** Success  
**User Chromatograms**

**Sample Name** HYL6013  
**Acquired Time** 2016-09-14  
**Acquired SW** 6200 series TOF/6500 series

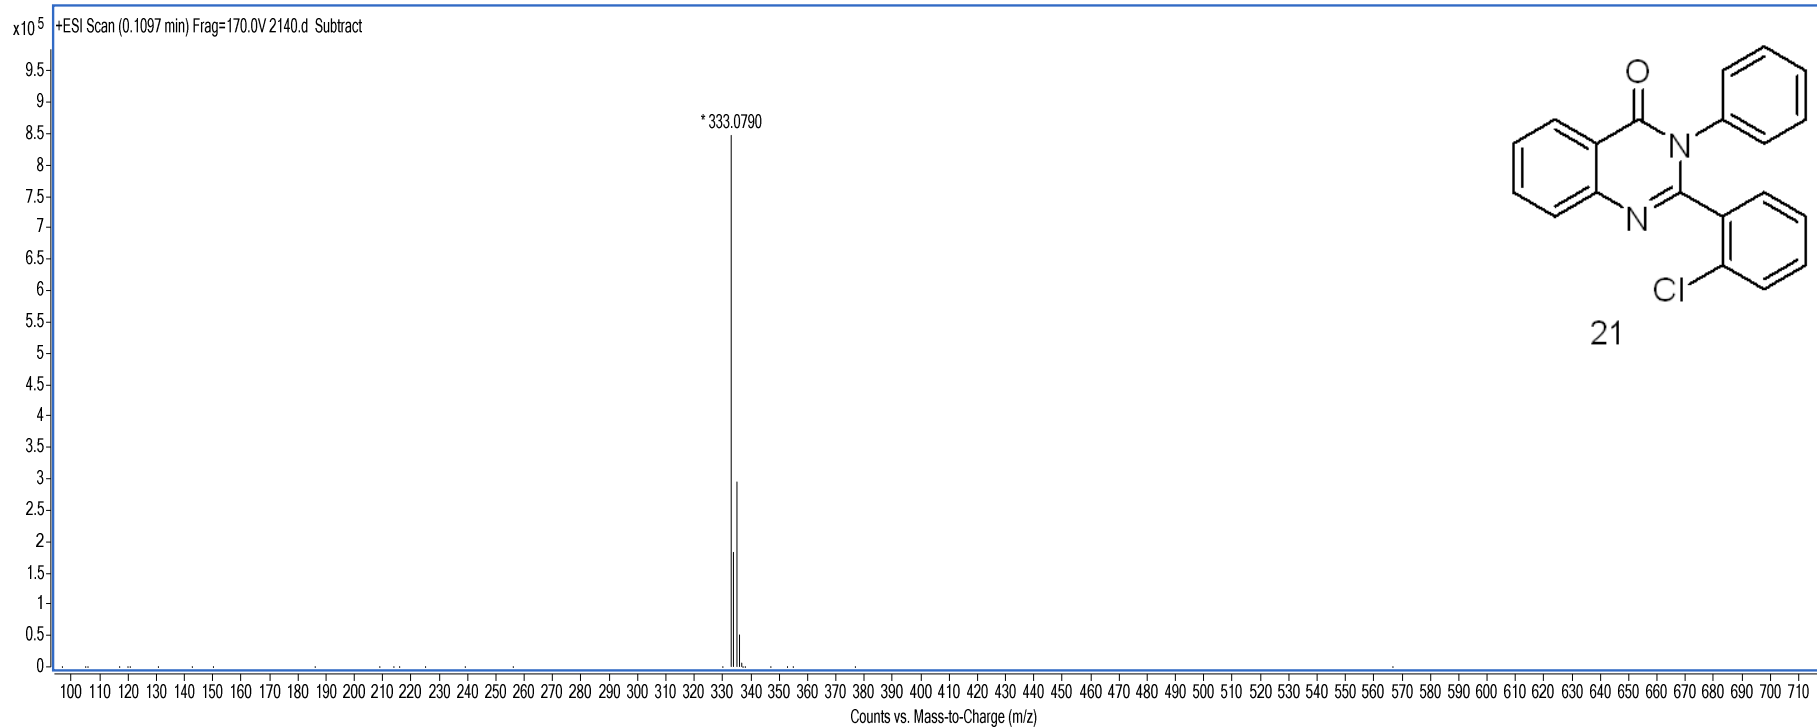

## Qualitative Analysis Report

**Data Filename** 2141.d  
**Instrument Name** TOF G6230A  
**Acq Method** YCL.M  
**IRM Calibration Status** Success  
**User Chromatograms**

**Sample Name** HYL6022  
**Acquired Time** 2016-09-14  
**Acquired SW** 6200 series TOF/6500 series

x10<sup>5</sup> +ESI Scan (0.1064 min) Frag=170.0V 2141.d Subtract

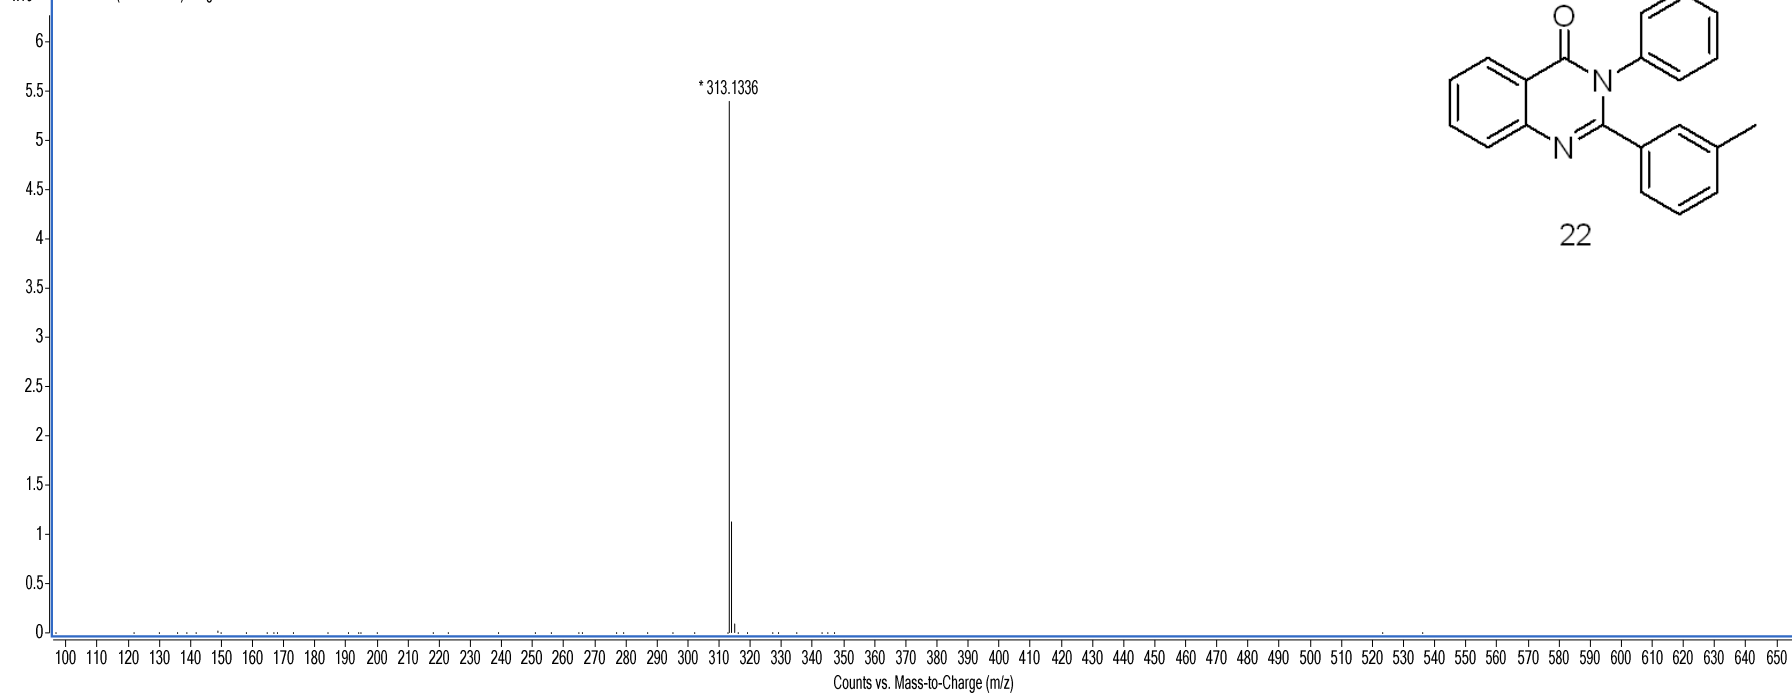

## Qualitative Analysis Report

**Data Filename** 2142.d  
**Instrument Name** TOF G6230A  
**Acq Method** YCL.M  
**IRM Calibration Status** Success  
**User Chromatograms**

**Sample Name** HYL6023  
**Acquired Time** 2016-09-14  
**Acquired SW** 6200 series TOF/6500 series

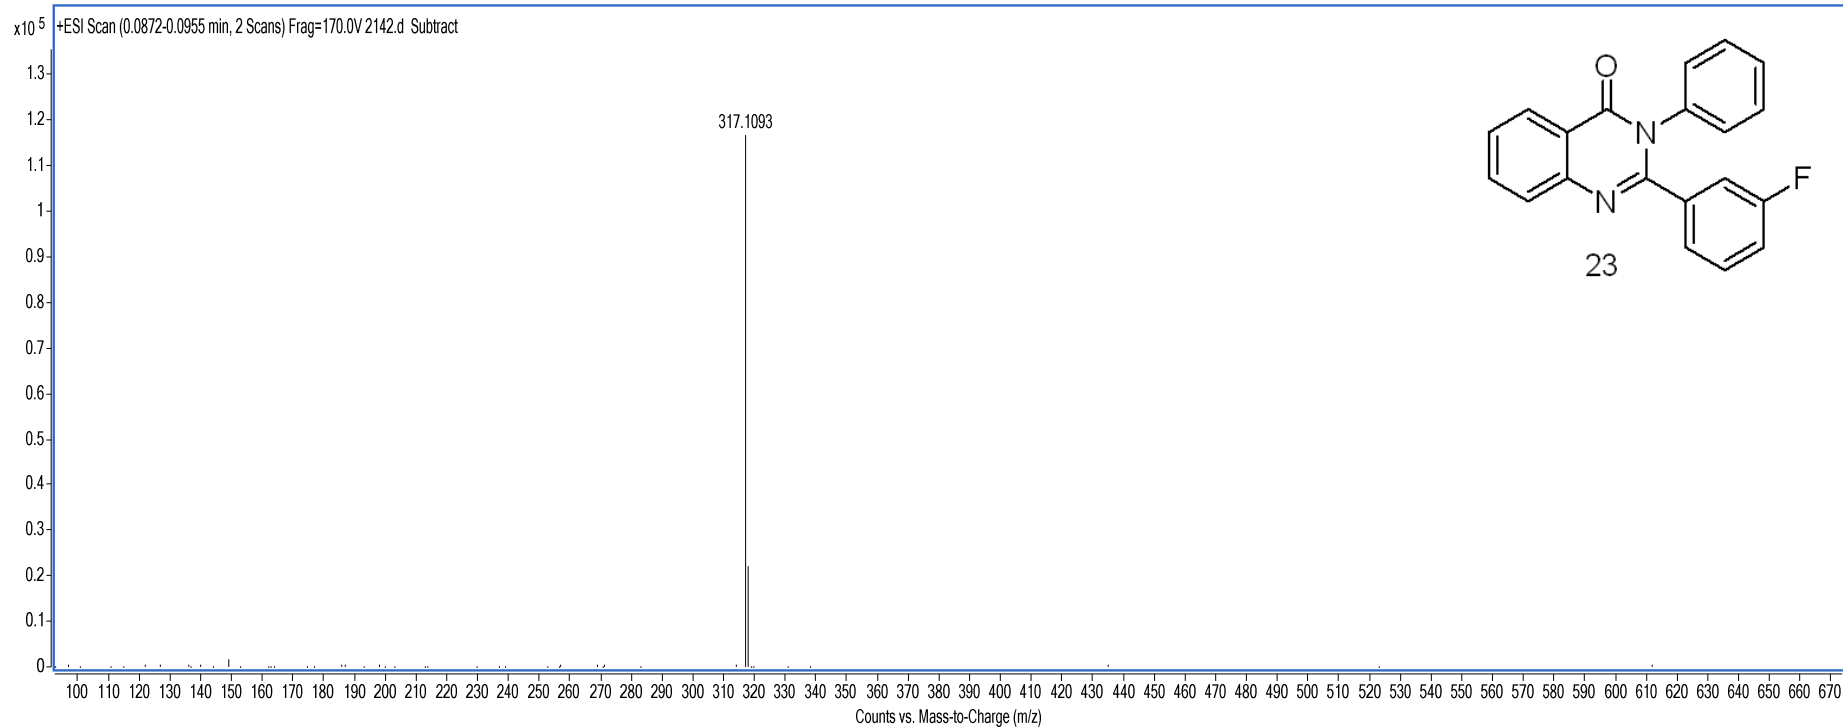

## Qualitative Analysis Report

|                        |            |               |                             |
|------------------------|------------|---------------|-----------------------------|
| Data Filename          | 2143.d     | Sample Name   | HYL6024                     |
| Instrument Name        | TOF G6230A | Acquired Time | 2016-09-14                  |
| Acq Method             | YCL.M      | Acquired SW   | 6200 series TOF/6500 series |
| IRM Calibration Status | Success    |               |                             |
| User Chromatograms     |            |               |                             |

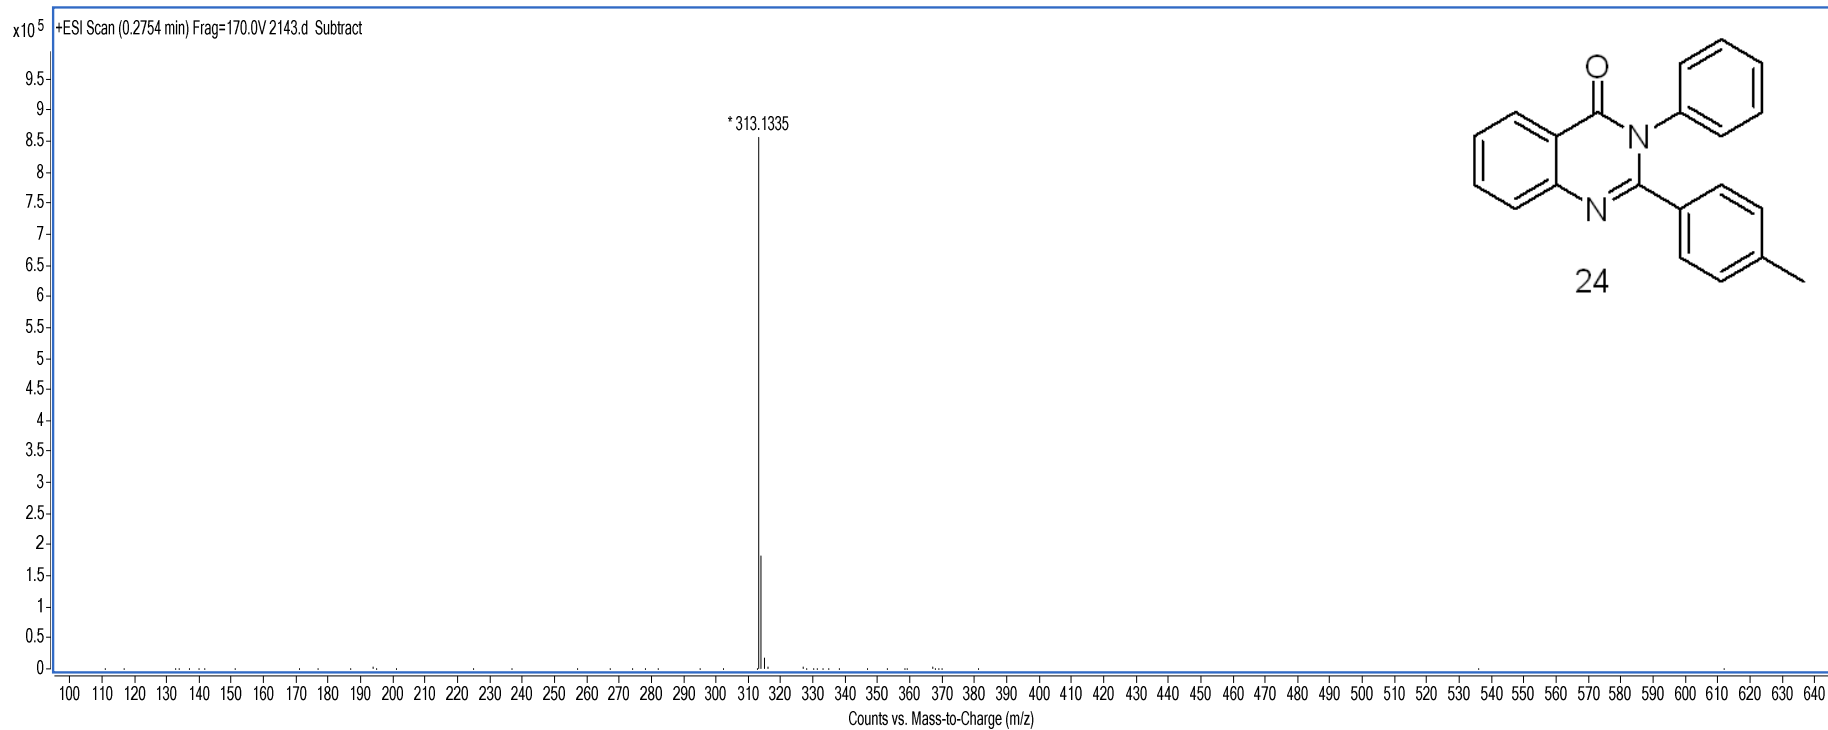

## Qualitative Analysis Report

**Data Filename** 2175.d  
**Instrument Name** TOF G6230A  
**Acq Method** YCL.M  
**IRM Calibration Status** Success  
**User Chromatograms**

**Sample Name** HYL6026  
**Acquired Time** 2016-09-19  
**Acquired SW** 6200 series TOF/6500 series

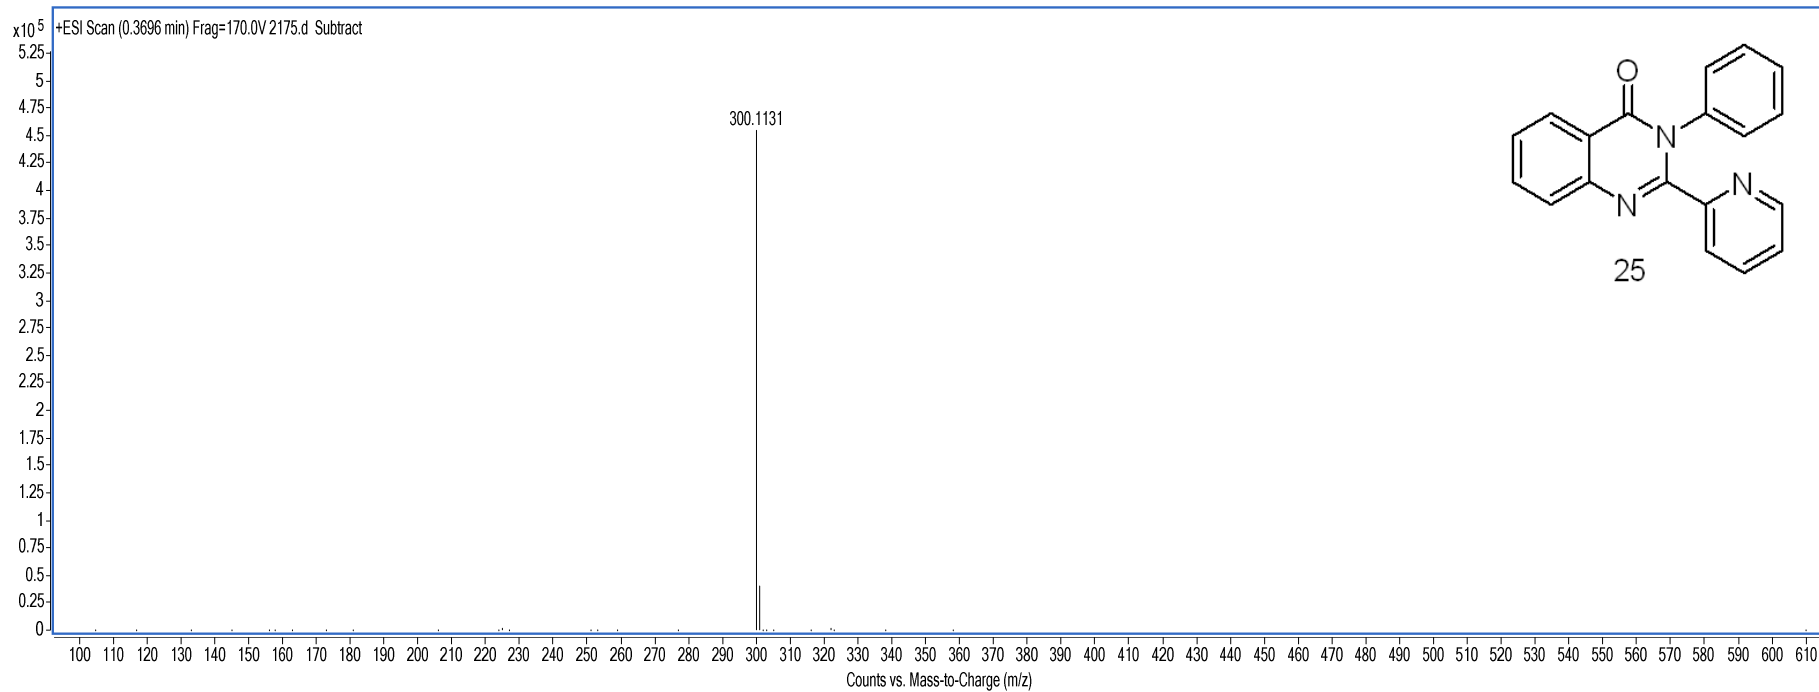



## Qualitative Analysis Report

**Data Filename** 2144.d  
**Instrument Name** TOF G6230A  
**Acq Method** YCL.M  
**IRM Calibration Status** Success  
**User Chromatograms**

**Sample Name** HYL6031  
**Acquired Time** 2016-09-14  
**Acquired SW** 6200 series TOF/6500 series

x10<sup>5</sup> +ESI Scan (0.1031-0.1115 min, 2 Scans) Frag=170.0V 2144.d Subtract

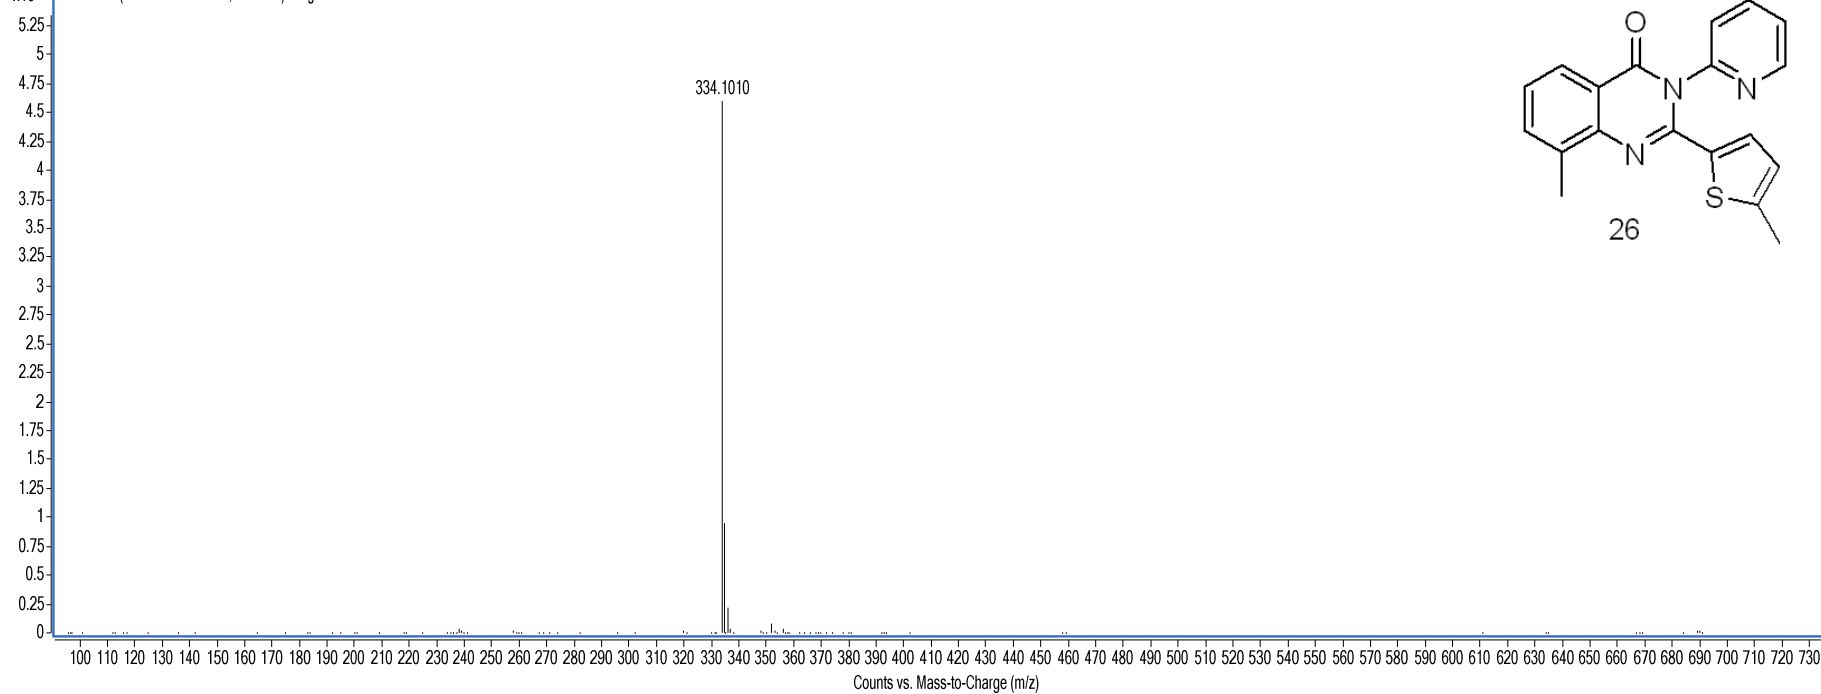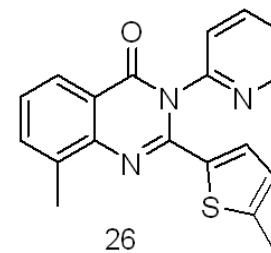

# Qualitative Analysis Report

|                        |            |               |                             |
|------------------------|------------|---------------|-----------------------------|
| Data Filename          | 0610.d     | Sample Name   | WJ2004                      |
| Instrument Name        | TOF G6230A | Acquired Time | 2017-02-08                  |
| Acq Method             | YCL.M      | Acquired SW   | 6200 series TOF/6500 series |
| IRM Calibration Status | Success    |               |                             |
| User Chormatograms     |            |               |                             |

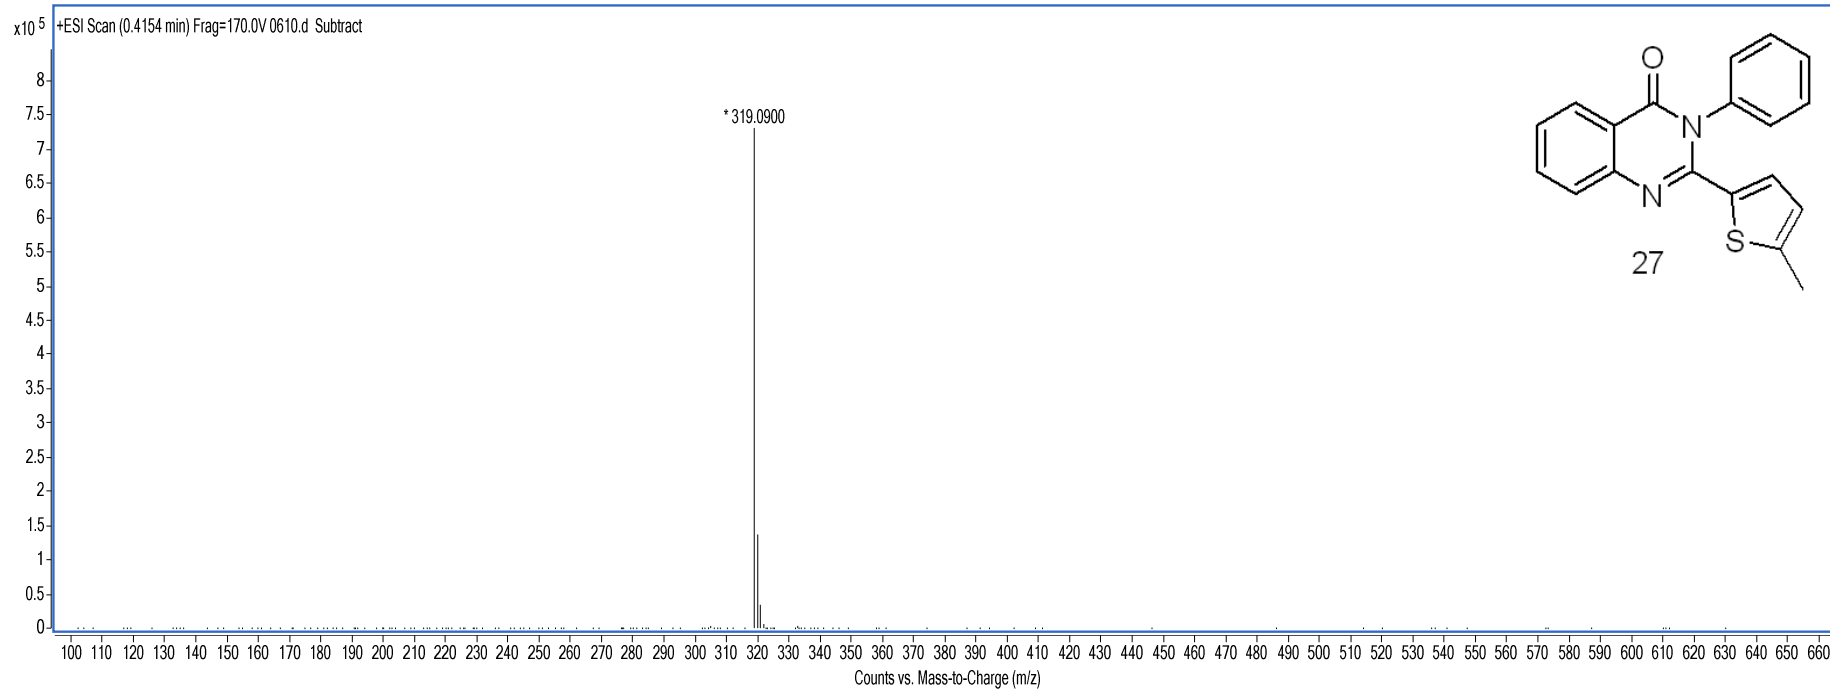

## Qualitative Analysis Report

|                        |            |               |                             |
|------------------------|------------|---------------|-----------------------------|
| Data Filename          | 0611.d     | Sample Name   | WJ2005                      |
| Instrument Name        | TOF G6230A | Acquired Time | 2017-02-08                  |
| Acq Method             | YCL.M      | Acquired SW   | 6200 series TOF/6500 series |
| IRM Calibration Status | Success    |               |                             |
| User Chromatograms     |            |               |                             |

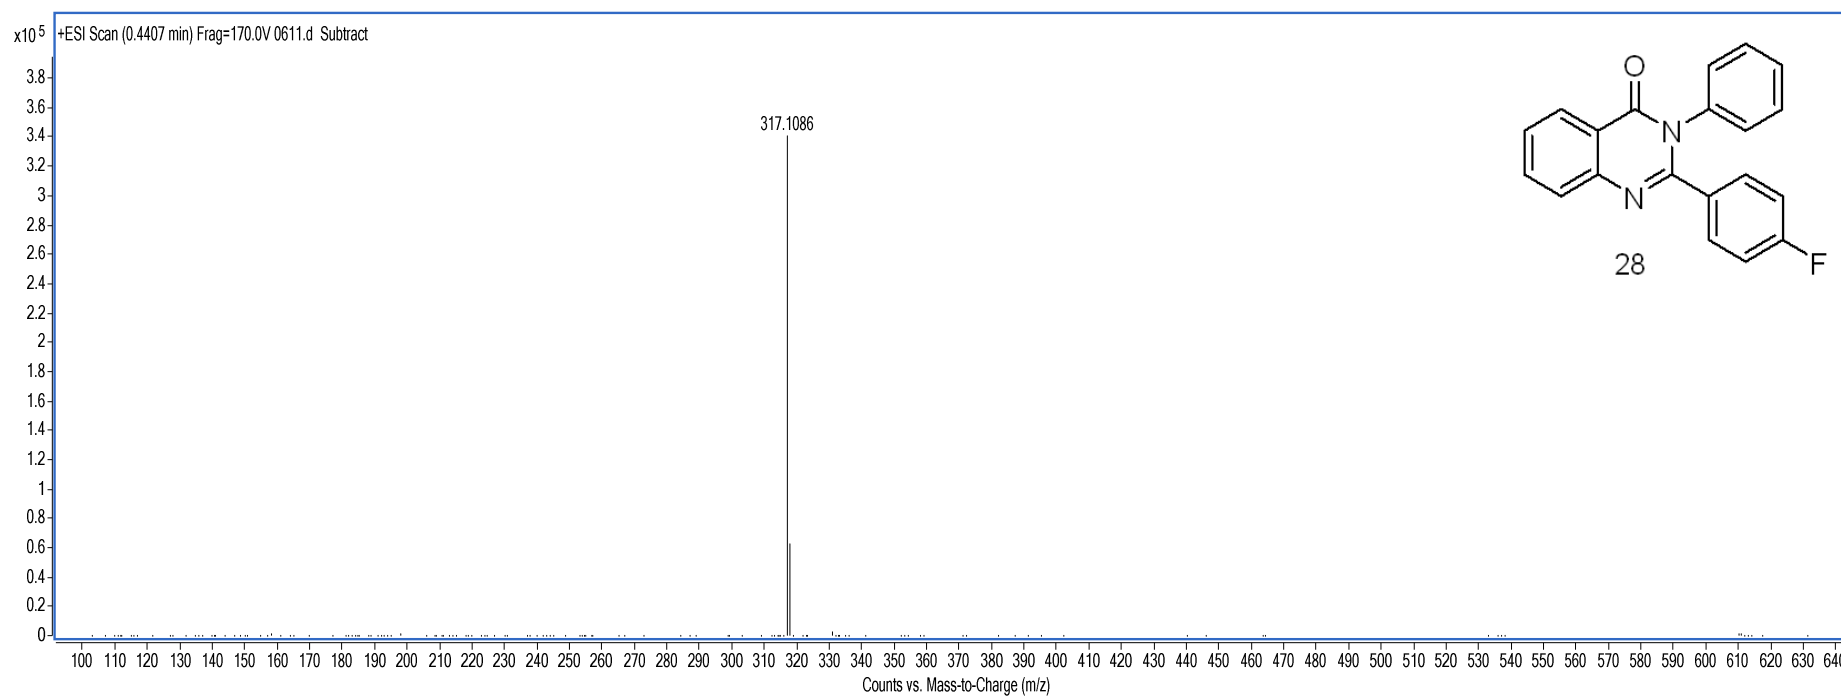

Supplement: c7qo00348j4.pdf [file c7qo00348j4.pdf]
